1 **TITLE: The Zinc Finger protein *S/ZFP2* is essential for**  
2 **tomato fruit locular tissue morphogenesis**

3  
4  
5 **Running title:** Tomato *S/ZFP2* Regulates Locular tissue Morphogenesis

6  
7  
8 **One sentence summary :** Alteration of cell division and endoreduplication in a *gel-less*  
9 mutant reveals the role of the transcription factor *S/ZFP2* in tomato locular tissue  
10 morphogenesis

11  
12  
13 **Authors:**

14 Gabriel Hoang<sup>1</sup>, Jorly Joana<sup>1</sup>, Dario Constantinescu<sup>2</sup>, Pascal G P Martin<sup>1</sup>, Stéphanie  
15 Gadin<sup>1</sup>, Jean-Philippe Mauxion<sup>1</sup>, Cécile Brès<sup>3</sup>, Virginie Garcia<sup>1</sup>, Nathalie Gonzalez<sup>1</sup>,  
16 Christophe Rothan<sup>1</sup>, Nadia Bertin<sup>2</sup>, Lucie Fernandez-Lochu<sup>1</sup> and Martine Lemaire-  
17 Chamley<sup>1</sup>

18  
19  
20 <sup>1</sup> INRAE, Bordeaux University, UMR Fruit Biology and Pathology, INRAE of Nouvelle  
21 Aquitaine Bordeaux, F-33140 Villenave d'Ornon, France

22  
23 <sup>2</sup> INRAE, UR Plantes et Systèmes de culture Horicoles, UR1115, F-84914 Avignon,  
24 France.

25  
26 <sup>3</sup> INRAE, Bordeaux Sciences Agro, UMR 1391 ISPA, 71 avenue Edouard Bourlaux, CS  
27 20032, F33882 Villenave-d'Ornon cedex, France;

28  
29 **Corresponding author:** [martine.lemaire@inrae.fr](mailto:martine.lemaire@inrae.fr)  
30

31

32 **ABSTRACT (200 mots max)**

33

34 In tomato (*Solanum lycopersicum* L.) fruit, the locular tissue (LT) is a unique jelly-like  
35 tissue that differentiates from the central axis of the fruit after ovule fertilization. LT is  
36 essential for seed development and dispersal by preventing early germination and  
37 initiating fruit ripening. In this work, we studied a “gel-less” mutant and identified the  
38 underlying mutation in the coding sequence of the C2H2 zinc finger transcription factor  
39 (TF) *SIZFP2*. Histological, cytological and molecular characterization from knockout-  
40 CRISPR/Cas9 lines for this gene revealed the strong and early impact of *zfp2* mutation  
41 on cell cycle and endocycle in LT. Additionally, model-based analysis of cellular data  
42 revealed that cell cycle was the main altered process, explaining the *zfp2* mutant  
43 phenotype. Further laser capture microdissection coupled with RNA-Seq analysis of  
44 young LT highlighted global expression changes between WT and *zfp2* mutant and led  
45 to a preliminary list of potential direct targets of the *SIZFP2* TF. This multifaceted  
46 approach not only uncovered a new role for *SIZFP2* TF as an essential regulator of LT  
47 morphogenesis, but also provides a foundation for future works aimed at deciphering the  
48 intricate regulatory networks governing fruit tissue development in tomato.

49

50 **Key words:**

51

52 C2H2 zinc finger transcription factor

53 *SIZFP2*

54 Tomato fruit development

55 Locular tissue morphogenesis

56

57

## 58 INTRODUCTION

59 Tomato is a major vegetable crop for human nutrition, consumed worldwide in multiple  
60 traditional recipes using fresh or processed tomatoes (Razifard et al., 2020; Wu et al.,  
61 2022). These diverse uses associated with the financial stakes for tomato industry have  
62 led to a strong specialization of tomato production for the industrial processing and fresh  
63 markets, including the selection of specific cultivars dedicated to one or the other market.  
64 Processing tomato cultivars produce dense fruits with a thick pericarp or carpel wall, a  
65 hypertrophied central axis consisting of extended columella and placenta, and are poor  
66 in seeds and surrounding jelly-like tissue called gel or locular tissue (LT). In contrast,  
67 fresh market cultivars generally produce juicier fruits, in particular, because of the large  
68 development of the LT that emerges from the placenta after ovule fertilization and liquefies  
69 during fruit ripening.

70 LT may represent up to 25 % of total fruit weight (Gillaspy et al., 1993; Lemaire-  
71 Chamley et al., 2019), but it is often overlooked and understudied. Consequently, only  
72 rare information is available on LT cellular structure, formation and differentiation. LT is  
73 composed of large thin-walled and highly vacuolated cells making the global tissue  
74 structure strongly differing from the fleshy pericarp tissue which differentiates from from  
75 the ovary wall after ovule fertilization (Lemaire-Chamley et al., 2005). LT is believed to  
76 prevent premature seed germination through osmotic limitation and by ABA signaling  
77 (Berry and Bewley, 1992; Berry and Bewley, 1993). Recent studies have also suggested  
78 a role for LT in fruit ripening, as evidenced by its early molecular and physiological  
79 changes during this process (Giovannoni et al., 2017; Chirinos et al., 2023). Comparative  
80 metabolic characterization of fruit tissues highlighted the specific enrichment of LT in  
81 particular metabolites such as citrate, malate, GABA or choline (Mounet et al., 2009;  
82 Lemaire-Chamley et al., 2019). Transcriptomic analyzes also underlined the specific  
83 transcriptomic global profile of LT, compared to other fruit tissues (Shinozaki et al., 2018).  
84 For instance, comparison between exocarp and LT transcriptomes more precisely  
85 highlighted the specific metabolic and hormonal features related to auxin and gibberellin  
86 signaling characterizing LT (Lemaire-Chamley et al., 2005).

87 Despite texture/structure differences between LT and pericarp, one can presume  
88 that common developmental features are shared between these tissues. Tomato fruit  
89 pericarp growth has been well described as driven by cell division and cell expansion  
90 processes. In-depth characterisation of these processes in the growing pericarp showed

91 that they both occur concomitantly in specific cell layers with a genotype dependent timing  
92 (Cheniclet et al., 2005; Xiao et al., 2009; Pabón-Mora and Litt, 2011; Renaudin et al.,  
93 2017; Mauxion et al., 2021). Cell divisions predominantly occur in the outer epidermis  
94 layer of the pericarp, sub-epidermal layers and to a lesser extent in the inner sub-  
95 epidermal cell layers, while cell expansion occurs predominantly in mesocarp cells,  
96 leading to more than 1000-fold increase in cell volume in some cultivars (Renaudin et al.,  
97 2017; Mauxion et al., 2021). Cell expansion results both from the increase of the vacuole  
98 by accumulation of water, ions and metabolic compounds and from the increase of the  
99 cytoplasmic volume, closely associated with endoreduplication, a process in which  
100 mitosis is by-passed after DNA replication, leading to the formation of giant polytene  
101 chromosomes with multivalent chromatids (Joubès and Chevalier, 2000; Bourdon et al.,  
102 2012). Ploidy of some pericarp cells can reach up to 512 C in some tomato cultivars  
103 (Cheniclet et al., 2005). Cell division and expansion processes also clearly drive LT  
104 differentiation (Joubès et al., 1999; Lemaire-Chamley et al., 2005; Mounet et al., 2009)  
105 but precise description of their mechanism and timing during LT morphogenesis still  
106 remains elusive. So far, few works showed that LT cells can reach comparable  
107 endoreduplication levels as pericarp cells (Joubès et al., 1999; Cheniclet et al., 2005) and  
108 underlined an apparent lower heterogeneity of cell types and size in LT compared to  
109 pericarp (Cheniclet et al., 2005; Lemaire-Chamley et al., 2005; Mounet et al., 2009).

110 Fruit tissues including pericarp and LT differentiate after ovule fertilization, due to  
111 signals originating from fertilized ovule (Gillaspy et al., 1993; Ruan et al., 2012; Ariizumi  
112 et al., 2013; McAtee et al., 2013; Fenn and Giovannoni, 2021). Characterization of  
113 parthenocarpic fruits, where fruit set is uncoupled from ovule fertilization highlights the  
114 importance of hormonal signaling with auxins, gibberelins and cytokinins positively  
115 affecting fruit set, while ABA and ethylene suppress it (Ruan et al., 2012; Ariizumi et al.,  
116 2013; Sotelo-Silveira et al., 2014; Fenn and Giovannoni, 2021). Auxin signaling was  
117 particularly investigated through the functional dissection of the Auxin Response Factors  
118 (ARFs) *SIARF5*, *SIARF7*, *SIARF8A/8B*, and auxin/indole-3-acetic acid 9 (*SIAux/IAA9*)  
119 transcriptional repressor (Wang et al., 2005; Goetz et al., 2007; de Jong et al., 2009; Hu  
120 et al., 2018; Liu et al., 2018; Hu et al., 2023). These transcription factors (TFs) are critical  
121 for tomato fruit set due to a direct crosstalk between auxin- and GA-signaling (Hu et al.,  
122 2018) and to the transcriptional control of developmental target genes, including the  
123 MADS-box TFs *SIAG1*, *SIMADS2* and *SIAGL6* (Hu et al., 2023). Recent advances in  
124 CRISPR technologies have enable more precise studies of fruit set and tissue growth

125 regulation. Accordingly, a recent work combining “à la carte” mutations in *ARF* and  
126 *Aux/IAA* TFs demonstrated signaling discrepancies between pericarp and LT since  
127 *SIARF5* and *SIARF7* are required for pericarp growth and not for LT morphogenesis (Hu  
128 et al., 2023). Other works showed that some key molecular actors of hormonal signaling,  
129 such as the ARFs, Aux/IAAs or Auxin efflux transport proteins, present tissue specific  
130 expressions suggesting contrasted developmental regulations between pericarp and LT  
131 (Mounet et al., 2012; Pattison and Catalá, 2012). For example, the MADS-box *SIMBP3*  
132 TF was shown to be specifically expressed in the LT, and involved in the regulation of LT  
133 morphogenesis through the transcriptional regulation of cell wall metabolism genes,  
134 endoreduplication and hormonal signaling genes (Zhang et al., 2019; Huang et al., 2021).

135 Given its specific role, structure and metabolic content, LT is an essential tissue in  
136 tomato fruit. In this work, we identified an original mutant severely affected in LT  
137 morphogenesis, pinpointed the underlying mutation in the gene encoding *SIZFP2*, a  
138 C2H2 TF, and functionally characterized it. In-depth histological and cytological  
139 description of fruits tissues from CRISPR/Cas9 *zfp2* mutants, combined with model-  
140 assisted analysis of the cellular cycle-related parameters showed that *SIZFP2* takes part  
141 in both cell cycle and endoreduplication regulation. Expression studies suggest that the  
142 function of *SIZFP2* in these fundamental processes might take place through the  
143 transcriptional regulation of cell division, chromatin and cytoskeleton organisation and  
144 hormones related genes. With these findings, we identified *SIZFP2* as a specific and  
145 essential regulator of LT morphogenesis.

## 146 **RESULTS**

### 147 **Identification of a retrotransposition event at the origin of a tomato *gel-less* mutant**

148 During the process of production of RNAi transgenic lines, we identified a *gel-less* mutant  
149 in the progeny of a single T0 line out of nine (line L2). The locular cavity of the *gel-less*  
150 fruits had a dry aspect and seeds presented an abnormal shape (Fig. 1, A to C). This  
151 unique phenotype was not associated with significant alterations of vegetative  
152 development, fruit growth and ripening kinetics nor fruit fertilization defects but fruit size  
153 and weight were significantly decreased and fruit firmness was increased in the *gel-less*  
154 mutant (Supplemental Table S1).

155 As association studies excluded a link between the observed phenotype and the  
156 transgene (Supplemental Fig. S1), we performed a classic mapping combined to

157 mapping-by-sequencing strategy to identify the causing event at the origin of the *gel-less*  
158 phenotype. For this, two plant populations were generated (Supplemental Fig. S1C, E).  
159 An outcrossing population between the homozygous *gel-less* Micro-Tom L-2.2 and the  
160 M82 dwarf genotype allowed to map the *gel-less* mutation within a 2 Mb region of  
161 chromosome 07 (Ch07) (Fig. 1D). The mapping by sequencing approach using a selfed  
162 (S1) population of the heterozygous *gel-less* Micro-Tom L-2.10, was developed to  
163 screen for SNV/SNP and structural variations in Ch07 associated to the mutant-like bulk.  
164 This analysis pointed out a region where the paired reads were not properly mapped in  
165 the mutant-like bulk compared to the WT-like bulk (Fig. 1E). This anomaly, coupled with  
166 the absence of reads overlapping the Ch07: 1 846 228 position in the mutant bulk,  
167 strongly suggested that an insertion occurred at this location specifically in the *gel-less*  
168 mutant (Fig. 1E). Amplification and sequencing of the *gel-less* allele confirmed that it is  
169 indeed a structural variant, with an insertion corresponding to a copia-like  
170 retrotransposon. As described for this type of retrotransposon (Galindo-González et al.,  
171 2017), a 5 bp direct duplication of the target site surrounded the insertion which includes  
172 two long terminal repeats, the primer binding site, the polypurine tract and ORFs coding  
173 for the Group-specific Antigen, Protease, Integrase, Reverse transcriptase and  
174 Ribonuclease H proteins (Fig. 1F and Supplemental Fig. S2). Genotyping of this insertion  
175 in the overall S1 population revealed a perfect co-segregation with the *gel-less* phenotype  
176 (Supplemental Table S2) and led to the conclusion that this insertion is very likely  
177 responsible for the *gel-less* phenotype. The comparison between the *gel-less* and the WT  
178 alleles of Ch07 showed that this retrotransposon was newly inserted in the coding  
179 sequence of the *SIZFP2* C2H2 TF encoding gene (NM\_001328428.1, *Solyc07g006880*)  
180 in the *gel-less* mutant plants (Fig. 1F). A 5'-RACE PCR combined with RT-qPCR analysis  
181 showed that these plants produced only a short chimeric mRNA, corresponding to the 5'  
182 UTR and the first 12 codons of *SIZFP2*, followed by the first LTR sequence of the  
183 retrotransposon and a premature stop codon (Fig. 1G).

184 Altogether, these data demonstrate that a retrotransposition event occurred  
185 fortuitously during RNAi lines production resulting in an alteration of the *SIZFP2* gene  
186 sequence leading to the *gel-less* mutant phenotype. Subsequently, the initial *gel-less*  
187 mutant will be referred to as a *zfp2* insertional mutant (*zfp2-i*) in the rest of this manuscript.

188 **CRISPR/Cas9 editing of *SIZFP2* severely impacts locular tissue morphogenesis**

189 Given that retrotransposon events may induce multiple insertions within a genome and  
190 perturb gene expression at their insertion site and in their vicinity (Galindo-González et  
191 al., 2017), we aimed to validate the mutation of the *SIZFP2* gene as the causal mutation  
192 of the *gel-less* phenotype by producing an allelic series of *zfp2* mutants (here referred to  
193 as *zfp2-c* mutants) using the CRISPR/Cas9 genome editing system (Supplemental Fig.  
194 S3, A to C). Relative expression analysis revealed a significant increase in *SIZFP2*  
195 endogenous transcript level in the CRISPR lines with a premature stop codon (*zfp2-c2.5*,  
196 *2.11* and *11.5*) while no change was observed in *zfp2-c4.1* line where the EAR motif was  
197 impaired (Supplemental Fig. S3D).

198 Consistent with the fruit specific expression of *SIZFP2* (Weng et al., 2015) and with  
199 the phenotype of the *zfp2-i* mutant, *zfp2-c* mutants displayed no alteration of vegetative  
200 organs nor flower development (Supplemental Fig. S4). Similar to the *zfp2-i* mutant, *zfp2-*  
201 *c* lines presented a decrease in fruit yield associated with the production of small and firm  
202 fruits. Three of the *zfp2-c* lines presented a significant increase in the number of seeds  
203 and a slight delay in the onset of fruit ripening by up to 2.7 days, followed by a shortening  
204 of fruit ripening duration from 1 to 1.7 days (Supplemental Table S4). Alike in the *zfp2-i*  
205 mutant (Fig. 1, A to C), the striking phenotype of *zfp2-c* mutants was the alteration of LT  
206 morphogenesis (Fig. 2). Whereas ovaries at 0 DPA were identical in the WT and *zfp2-c*  
207 lines, a defect in LT morphogenesis was clearly visible as soon as 5 DPA in all *zfp2-c*  
208 lines (Fig. 2A). Both columella/placenta and LT/seed were underdeveloped in *zfp2-c* fruits  
209 compared to the WT fruits (Fig. 2B), when pericarp and septum surrounding tissues  
210 proportionally occupied a larger space within the fruits. At 25 DPA, LT in *zfp2-c* lines  
211 exhibited a non-gelatinous appearance and barely surrounded the developing seeds.  
212 Consequently, the relative proportion of the LT/seed compartment was reduced in the  
213 *zfp2-c* lines compared to the WT for the benefit of columella/placenta compartment but  
214 with low impact on pericarp and septum tissues relative proportions (Fig. 2A-B). Closer  
215 examination of seeds environment suggested that the modification of surrounding tissues  
216 could lead to a compression of the developing seed, provoking seed shape alterations  
217 (Supplemental Fig. S5A, B). These alterations were associated with a significant  
218 decrease in seed weight and a slight but non-significant decrease in germination rate  
219 (Supplemental Fig. S5C).

220 Altogether, these findings strongly suggest an important role of *SIZFP2* in LT  
221 morphogenesis. In addition, they showed that *zfp2-c2.5* and *zfp2-c2.11* were the most



222 affected lines. We therefore undertook detailed histological, cytological and molecular  
223 characterization of these two *zfp2-c* lines.

## 224 ***zfp2-c* mutants display early alterations of cell division and endocycle in locular** 225 **tissue**

226 To elucidate the cellular basis of LT tissue alteration in *zfp2-c* lines, we conducted a  
227 histological characterization of the cell domes emerging from the placenta between the  
228 seeds throughout fruit development (Supplemental Fig. S6, Fig. 3A). While the mean cell  
229 area increased up to 118-fold in the WT domes during fruit growth (0 to 25 DPA), it only  
230 increased up to 28-fold in *zfp2-c* lines (Fig. 3B). In addition, whereas mean cell area  
231 started to notably increase as early as 4 DPA in the WT domes, it increased only from 6  
232 DPA in both *zfp2-c* lines (Fig. 3B). These results suggest both a delay in the onset of cell  
233 expansion in the domes of *zfp2-c* lines and a limitation of this process throughout fruit  
234 development.

235 Since cell growth is closely associated with endoreduplication in tomato fruit  
236 (Chevalier et al., 2011; Musseau et al., 2017; Renaudin et al., 2017), we analyzed nuclear  
237 ploidy levels in the central tissues of *zfp2-c* and WT fruits (Supplemental Fig. S7). Our  
238 results revealed a significant decrease in endoreduplication factor (EF) in both *zfp2-c*  
239 lines compared to the WT from 6 DPA (Fig. 3C). This difference resulted from a delay in  
240 the decrease of 2C nuclei proportion in *zfp2-c* lines (Fig. 3D) and a marked shift of the  
241 4C nuclei peak from 2-6 DPA in the WT to 8-10 DPA in *zfp2-c* lines (Fig. 3E). In addition,  
242 *zfp2-c* lines exhibited by a strong reduction in the accumulation of polyploid nuclei (8C to  
243 128C) ranging from 49 % in the WT to 8 % in *zfp2-c* lines at 8 DPA, and from 84 % to 65  
244 % respectively at 25 DPA (Fig. 3F). Despite their lower proportions, the different nuclear  
245 populations (8C to 128C) were detected at a similar developmental stage in *zfp2-c* lines  
246 and WT (Supplemental Fig. S8). Overall, these results suggest a longer cell division  
247 period leading to lower proportions of cells entering the endocycle. A potential alteration  
248 of the transition from cell division to endoreduplication nor an alteration of the  
249 endoreduplication process itself in *zfp2-c* lines could not be excluded.

250 According to these results, we analysed by RT-qPCR the expression of selected  
251 marker genes for cell cycle regulation (*SICDKB1.1*; Joubès et al., 2000), cytokinesis  
252 (*SIKNOLLE*; Reichardt et al., 2011) and endoreduplication (*SICCS52A* Mathieu-Rivet et  
253 al., 2010a; Mathieu-Rivet et al., 2010b) (Fig. 3G to I) during LT morphogenesis. While the  
254 expression of cell cycle and cytokinesis genes (*SICDKB1.1*, *SIKNOLLE*) decreased after



255 2 DPA in the WT, their expression was maintained longer in both *zfp2-c* lines. This  
256 expression change was significant at 6 and 8 DPA (Fig. 3G-H) and particularly  
257 pronounced for *SIKNOLLE* which exhibited a strong peak of expression at 6 DPA,  
258 whereas the maximum of expression for this gene was reached a 2 DPA in the WT.  
259 Conversely, the expression of the endoreduplication marker *SICCS52A* was slightly  
260 decreased in *zfp2-c* lines between 8 and 10 DPA, compared to the WT (Fig. 3I). Taken  
261 together, the cellular characterization and the expression analysis suggest an alteration  
262 of both cell division and endoreduplication processes during LT morphogenesis in *zfp2-c*  
263 lines.

264 It should be noted that these cellular alterations were specific to LT because the  
265 histological and cytological analysis of pericarp during the same developmental period  
266 (Supplemental Fig. S9) showed only faint differences between *zfp2-c* lines and the WT.  
267 Furthermore, ploidy analysis of dissected tissues from 25 DPA fruit clearly showed that  
268 only LT was significantly altered in *zfp2-c* lines (Supplemental Fig. S10).

### 269 **Model-based analysis of cellular parameters reveals the predominant impact of cell** 270 **division alterations over endoreduplication in *zfp2-c* lines**

271 According to the intrication of the cellular processes sustaining fruit tissue morphogenesis  
272 and the lack of data available for LT, we used a cellular process-based model to prioritize  
273 the role of division and endoreduplication and their interactions in the observed  
274 differences between WT and *zfp2-c2.5* and *zfp2-c2.11* lines. The model was initially  
275 developed to simulate the pericarp cell dynamics but can however be generalized to other  
276 growing tissues (Bertin et al., 2007; Baldazzi et al., 2019) (Fig. 4A). We formulated three  
277 hypotheses which could explain the phenotypical differences between WT and *zfp2-c*  
278 *lines*, each one representing a different model parameterization: 1) only division-related  
279 parameters were affected in the *zfp2-c* lines (Div hypothesis); 2) only endoreduplication-  
280 parameters were affected in the *zfp2-c* lines (Endo hypothesis), and 3) both division and  
281 endoreduplication parameters were affected in the *zfp2-c* lines (Div+Endo hypothesis).  
282 The model parameters were estimated for the three hypotheses with the genetic algorithm  
283 NSGAI1 (Deb et al., 2002) in order to minimize the prediction errors in simulating cell  
284 number and ploidy data collected on the LT tissue. The application of this algorithm  
285 allowed us to select 25 solutions for each hypothesis (Supplemental Fig S11). The  
286 comparison of these results with the actual data helped us to select the most likely  
287 hypothesis.

288 The model simulations slightly overestimated the cell number of the three  
289 genotypes between 0 and 6 DPA in all the hypotheses (Fig. 4B), the Div+Endo hypothesis  
290 being the more viable one. Cell number predictions obtained with Div or Div+Endo  
291 hypotheses were the most accurate for WT and *zfp2-c* behaviours, while the Endo  
292 hypothesis did not discriminate mutants from the WT. According to these results, the  
293 Div+Endo hypothesis better explained the observed variables behaviors, with satisfying  
294 NRMSE indexes for the prediction of cell numbers, as well as for cells in 2C, 4C, and 8C  
295 ploidies for all the genotypes (Fig S11). The box-plot of the model parameters among all  
296 the solutions of the Div+Endo hypothesis showed that *zfp2-c2.5* and to a lesser extent  
297 *zfp2-c2.11* had a higher time between two division events and a higher fraction of cells  
298 entering division at each division event compared to the WT genotype (Fig. 4C). We  
299 obtained a high uncertainty in the parameter defining the time between two  
300 endoreplication events due to its large variability in the WT and the fraction of  
301 endoreduplicating cells was globally low for the three genotypes, compared to the  
302 proportion of dividing cells, but seems to be lower in the *zfp2-c* lines compared to the WT  
303 (Fig. 4C).

304 The overall simulation results clearly excluded an alteration of only  
305 endoreduplication process in *zfp2-c* mutants and rather suggested that the observed  
306 phenotypic differences in LT in terms of cell number and ploidies could be the result of a  
307 combination of both cell division and endoreplication processes alterations, with cell  
308 division playing a more relevant role, through the alteration of cell division parameters.  
309 These results are consistent with the fact that the *gel-less* phenotype is already strong at  
310 5 DPA (Fig. 2), when cell division is the predominant process in WT fruits.

### 311 **Metabolism related genes and developmental regulators are misregulated in *zfp2-*** 312 ***c* mutant**

313 To better understand the early changes in the morphogenesis program of LT cells in *zfp2-*  
314 *c* lines, a laser capture microdissection (LCM) coupled with RNA-seq was performed on  
315 the emerging LT cell domes collected from *zfp2-c11* and WT 4 DPA fruits (Fig 5A).  
316 Statistical analysis revealed 645 genes down-regulated and 491 genes were up-regulated  
317 in *zfp2-c11* line compared to WT (Supplemental Table S5). While the genes down-  
318 regulated genes in the *zfp2-c* line included genes involved in WT LT morphogenesis, the  
319 up-regulated genes included those repressed during WT LT differentiation and potential  
320 *S/ZFP2* direct target genes. Indeed, *S/ZFP2* likely acts as a transcriptional repressor alike

321 many C2H2 TF due to the presence of an ethylene-responsive element binding factor  
322 (ERF)-associated amphiphilic repression (EAR) motif at its C-terminal end (Supplemental  
323 Figure S3; Kagale and Rozwadowski, 2011).

324 Almost all main primary metabolism-related functional categories according to  
325 MapMan ontology (Thimm et al., 2004), including Photosynthesis, Cellular Respiration,  
326 Carbohydrate Metabolism, Lipid and Amino acid Metabolism were significantly enriched  
327 among the down-regulated genes together with Secondary Metabolism, Redox  
328 Homeostasis, Solute Transport, and Large Enzyme Families categories, reflecting major  
329 metabolic changes in *zfp2-c11* dome cells (Fig 5B, Supplemental Table S6). Key genes  
330 involved in sucrose metabolism (fructokinase, hexokinase, invertase), glycolysis  
331 (fructose-1,6-bisphosphate aldolase, glyceraldehyde 3-phosphate dehydrogenase), and  
332 organic acid metabolism (NAD-dependent isocitrate dehydrogenase,  
333 phosphoenolpyruvate carboxylase, NADP-malic enzyme, malate dehydrogenase) were  
334 down-regulated in *zfp2-c11* line compared to the WT. In addition, about 60 genes  
335 encoding diverse solute transporters, including sugar, organic acid, amino acid, and ions  
336 transporters, as well as proton ATPases were down regulated in the *zfp2-c11* line  
337 compared to the WT, which may be indicative of lack or low accumulation of water,  
338 mineral ions, and metabolites in the vacuoles of LT cells. These results are in connection  
339 with the delay of cell expansion characterizing *zfp2-c* LT (Fig. 3B). Since cell enlargement  
340 depends not only on the increase in turgor pressure by osmolyte and water accumulation  
341 inside the vacuole of fruit cells, but also on cell wall loosening, changes in the transcript  
342 levels of cell-wall-related proteins was also surveyed. Among these genes (Supplemental  
343 Table S7), a few were misregulated in *zfp2-c11* compared to the WT (15 down- and 28  
344 up- regulated). The different gene families were represented by specific genes in both  
345 groups (cellulose synthases, expansins, pectinesterases, glucan endo-1,3-beta-  
346 glucosidases), but genes encoding glucomannan 4-beta-mannosyltransferases,  
347 xyloglucan endotransglucosylases/ hydrolases and polygalacturonases were  
348 preferentially up-regulated.

349 Enrichment analyses of MAPMAN categories performed on the RNAseq data also  
350 showed that the “Phytohormone action” category was significantly enriched among the  
351 up- and down-regulated genes (Fig. 5B). GO enrichment analysis further indicated that  
352 hormonal changes were more related to brassinosteroid for the down-regulated genes  
353 and to auxin for the up-regulated genes (Fig. 5C and D). The up-regulated auxin-related  
354 genes included eight Aux/IAA and an ARF TFs, three genes related to auxin conjugation

355 and two PIN auxin efflux transporters (Supplemental Table S8). Furthermore, the  
356 MAPMAN “RNA Biosynthesis” functional category, which also includes the TFs (Thimm  
357 et al., 2004), was specifically enriched among the up-regulated genes (Fig. 5B). In the list  
358 of up-regulated TFs (Supplemental Table S9), the main features included the presence  
359 of *SIZFP2* together with four other genes encoding C2H2 zinc finger TFs, of nine genes  
360 encoding bHLH TFs and of only two genes encoding MADS-BOX TFs (*SITM6/TDR6* and  
361 *SIMADS67*). *SIMBP3*, which is involved in LT differentiation (Zhang et al., 2019; Huang  
362 et al., 2021; Kim et al., 2022), was not found in the list of DEG and only up-regulated at 6  
363 DPA in *zfp2-c* lines as shown by RT-qPCR (Supplemental Fig. S12).

364 An intriguing result was the over-representation of the Chromatin Organisation  
365 MAPMAN category (Fig. 5B) and the Chromatin Silencing, Nucleosome assembly and  
366 positioning, DNA recombination, and Actin filament organization GO categories in the up-  
367 regulated genes (Fig. 5D). Indeed, 20 genes encoding histones or proteins involved in  
368 histone chaperoning/modification, five genes implicated in the RNA-directed DNA  
369 methylation (RdDM) (Erdmann and Picard, 2020) epigenetic pathway (*SIRD4*,  
370 *SIMORC*, *SISHH1*, *DNA topoisomerase SITOP2* and the *DNA polymerase SIPOLD4*)  
371 were up-regulated in *zfp2-c11* (Table 1), suggesting an alteration of chromatin structure  
372 and accessibility within *zfp2-c11* fruit cell dome. Furthermore, 13 genes involved in  
373 cytoskeleton organisation and microtubule dynamics were up-regulated in *zfp2-c11* and  
374 maybe indicative of an alteration of nucleus and/or cell division/growth. Surprisingly, only  
375 12 genes directly related to cell division were mis-regulated in *zfp2-c11*. They only  
376 included up-regulated genes among which four cyclins (*SICycA3.1*; *SICycD3.1*;  
377 *SICycD3.2*; *SICycU4.1*) and a cyclin-dependent kinase inhibitor (Table 1).

378 According to the repression role of *SIZFP2*, due to the presence of the EAR  
379 repression domain (Kagale and Rozwadowski, 2011), we searched for potential *SIZFP2*  
380 direct target genes by promoter enrichment analysis in the list of the 491 up-regulated  
381 DEG in *zfp2-c* (Supplemental Table S5). This analysis resulted in the identification of two  
382 motif clusters (Fig. 5E) present in 253 (Cluster1) and 205 (Cluster4) of the 491 up-  
383 regulated genes, respectively. It should be noted that these clusters were not present in  
384 the promoter of *SIZFP2* gene, suggesting that the up-regulation of *SIZFP2* in *zfp2-c* lines  
385 was due to indirect regulation of *SIZFP2* rather than to an auto-regulation. A maximal  
386 number of motifs were found in the promoter of MADS box TF *SIMADS67* (6) and the  
387 C2H2 TF *SIGIS2* (5) (Supplemental Table S9). Interestingly, these motifs were  
388 respectively present in 76 % and 83% of the promoters of genes present in the cell

389 division, chromatin and cytoskeleton organisation (Table1) and hormone-related up-  
390 regulated genes categories (Supplemental Table S8).

## 391 **DISCUSSION**

392 In the current study, we described the implication of the C2H2 zinc finger protein *SIZFP2*  
393 (*Solyc07g006880*) in the morphogenesis of locular tissue by describing the cellular and  
394 molecular alterations induced by its mutation via CRISPR/cas9 gene editing.

### 395 **A new role for a member of the large C2H2-type Zinc Finger transcription factor** 396 **family**

397 *SIZFP2* is a member of the C2H2-type Zinc Finger transcription factor family, which  
398 contains about one hundred members in tomato (Hu et al., 2019; Zhao et al., 2020) and  
399 about 170 members in *Arabidopsis* (Englbrecht et al., 2004; Xie et al., 2019). It belongs  
400 to the plant specific C1-1i subclass presenting a unique C2H2 motif where the first  
401 histidine residue of the zinc finger is included in a plant-specific conserved motif  
402 “QALGGH” (Englbrecht et al., 2004; Xie et al., 2019). Many members of this subclass,  
403 grouping 33 members *in Arabidopsis*, have been characterized because of their role in a  
404 range of developmental processes such as trichome initiation and development (GIS,  
405 GIS2, GIS3, ZFP5, ZFP6, ZFP8), floral meristem and flower development (JAGGED,  
406 KNUCKLES, NUBBIN, RABBIT EARS, SUPERMAN), floral organ abscission (ZFP2),  
407 germination and seedling development (ZFP3).

408 C2H2 C1-1i subfamily is much less studied in tomato. Genome-wide analysis of  
409 C2H2 TFs sequences in tomato led to the conclusion that *SIZFP2* and the C2H2-  
410 *Solyc03g117070* are duplicated genes, *Solyc03g117070* being expressed in roots,  
411 whereas *SIZFP2* is fruit-specific (Weng et al., 2015; Hu et al., 2019). Only *SIZFP2* and  
412 *SIZFP6/ZFP8L* were characterized for their respective implication in fruit ripening and  
413 seed germination or trichome differentiation (Weng et al., 2015; Zheng et al., 2022). Upon  
414 analysis of the effect of over-expression and RNAi silencing of *SIZFP2* in *S.*  
415 *pimpinellifolium* tomato wild relative and M82 cultivar, *SIZFP2* was proposed as an ABA  
416 repressor involved in flowering, fruit set, ripening, and seed physiology (Weng et al.,  
417 2015). In agreement with these previous results, we observed here a slight ripening delay  
418 in *zfp2-c* lines (Supplemental Table S4). Weng et al. (2015) also observed a strong  
419 interplay with seed germination especially within LA1589 RNAi lines that displayed  
420 reduced germination rate, a phenotype also slightly observed within *zfp2-c* lines obtained  
421 in our study (Supplemental Table S5). In addition, we have shown in this work that



422 complete knock-out of *SIZFP2* via CRISPR/cas9 gene editing, triggers a *gel-less*  
423 phenotype resulting from the alteration of both cell division and endoreduplication. The  
424 absence of this strong phenotype in the RNAi lines from *S. pimpinellifolium* and M82 might  
425 be due to the incomplete silencing of *SIZFP2* (Weng et al., 2015), since we clearly showed  
426 that only the homozygous mutants (*zfp2-i* and *zfp2-c* lines) present the *gel-less*  
427 phenotype, while the heterozygous mutants harbour a WT-like LT. In addition to its role  
428 in seedling, trichome or flower development, C2H2-type Zinc Finger transcription factor  
429 family also plays an important role in LT development in the fruit *via* the activity of *SIZFP2*.

### 430 **LT and pericarp: neighbours but not twins**

431 As in vegetative organs including roots and leaves, fruit development is characterized by  
432 the successive occurrence of cell division, cell expansion and differentiation processes.  
433 In tomato, the cell division period is divided into two phases. The first period before  
434 anthesis gives rise to an ovary devoided of LT with a carpel wall of nine to 12 cell layers  
435 (Renaudin et al., 2017). Growth then stops and the second period of cell division is  
436 promoted after pollination when fertilization signals induce a resumption of growth. This  
437 process occurs at least in two different areas within the fruit: i) the epidermis and sub-  
438 epidermal cell layers in the pericarp, which are respectively responsible for pericarp radial  
439 and thickness growth (Renaudin et al., 2017); and ii) the placenta, reminiscent of the floral  
440 meristem stem cells, that produces the ovules during flower bud differentiation (Bollier et  
441 al., 2018) and the LT after fertilization. According to our histological data on LT (Fig. 3)  
442 and pericarp (Supplemental Fig.S9) and to previous work (Renaudin et al., 2017), both  
443 tissues seem to enter their developmental phases simultaneously. They are both  
444 characterized by a short period where cell division is preponderant, followed by a long  
445 period of cell expansion associated with endoreduplication, starting between 4 and 6  
446 DPA. However, despite these common kinetics, both tissues are definitely morphologically  
447 different (Supplemental Fig. S6): i) LT dome cells are much more homogeneous in size  
448 than pericarp cells, and only two cell types are visible: the external cell layer, and the  
449 disordered internal cells; ii) internal LT dome cells are elongated with wavy cell walls,  
450 contrasting with the smooth and rounded aspect of pericarp cells. These morphological  
451 discrepancies between developing LT and pericarp were shown to be associated with  
452 global compositional differences (Jones et al., 1997; Mounet et al., 2009; Lemaire-  
453 Chamley et al., 2019).

454 In addition to these phenotypical discrepancies between both tissues, there is  
455 growing evidence that specific regulations take place in LT and pericarp. Here, we



456 showed that *zfp2-c* mutants display no/poor alterations of pericarp tissue morphogenesis  
457 (Supplemental Figure S9), contrasting with the drastic effect on LT morphogenesis (Fig.  
458 3), whereas *SIZFP2* is expressed in both pericarp and locular tissue (Supplemental Figure  
459 S12). This might suggest that *SIZFP2* needs a LT-specific partner/effector to exert its LT-  
460 specific effect. This is consistent with the observation that although the overall gene  
461 expression is very comparable in pericarp and LT, the later is characterized by distinct  
462 developmental trajectory compared to other fruit tissues (Mounet et al., 2009; Shinozaki  
463 et al., 2018; Lemaire-Chamley et al., 2019).

#### 464 **Toward a characterization of the LT morphogenesis network**

465 The characterization of *zfp2-c* mutants performed here clearly showed that *SIZFP2* is  
466 essential for LT morphogenesis. Before the present work, only *SIMBP3* was proven to be  
467 involved in this process (Zhang et al., 2019; Huang et al., 2021; Kim et al., 2022). Given  
468 that this TF is involved in LT morphogenesis, mostly through the regulation of gene  
469 categories different from *SIZFP2*, and that both TFs are not DEG in the transcriptome of  
470 each other mutant (the present work, Zhang et al., 2019; Huang et al., 2021), it is very  
471 likely that both *SIZFP2* and *SIMBP3* intervene at different levels during LT  
472 morphogenesis. A comparative phenotyping and transcriptomic profiling of *mbp3* and  
473 *zfp2-c*, together with the double mutant *mbp3 zfp2* if viable, would be interesting to rule  
474 on the respective involvement of both TFs in LT morphogenesis and highlight their  
475 eventual interplay.

476 In agreement with the RNAseq data previously published on *SIZFP2*-RNAi lines  
477 (Weng et al., 2015), a large number of phytohormone-related genes were misregulated  
478 in the *zfp-c* mutant (Fig. 5), especially those related to auxin (Supplemental Table S8),  
479 suggesting that *SIZFP2*-dependent LT morphogenesis could rely on auxin signaling.  
480 Such an hypothesis is fully consistent with the cellular alterations observed during LT  
481 morphogenesis in *zfp2-c* mutants and with the known role of auxin in the regulation of the  
482 cell cycle, while auxin affects transition from G1 to S phases and from the mitotic cycle to  
483 the endocycle (Ishida et al., 2010) and drives cell expansion (Srivastava and Handa,  
484 2005; Klee and Giovannoni, 2011; Ariizumi et al., 2013; McAtee et al., 2013; Wang and  
485 Ruan, 2013; Azzi et al., 2015; Quinet et al., 2019; Molesini et al., 2020; Li et al., 2021).

486 At the moment, we do not know if the alteration of cell division and  
487 endoreduplication processes in *zfp-c* mutants is due to an indirect consequence of cell  
488 division alterations on the cycle to endocycle transition or on endocycle itself, or if it is

489 due to the alteration of an essential cellular mechanism affecting both cell division and  
490 endoreduplication. In this context, the over-representation of chromatin structure related  
491 genes in the up-regulated gene in *zfp2-c* lines is of particular interest (Fig.5). It may be a  
492 sign of an alteration of the fine tuning of chromatin structure, impacting access to the  
493 genetic information, with consequences on essential cellular parameters. At the moment,  
494 it is well assumed that chromatin dynamics is both an effector and an actor of cell cycle  
495 progression, due to the local loosening of chromatin structure during the S phase,  
496 necessary for the access of the enzymatic machinery required for DNA synthesis (Ma et  
497 al., 2015). In addition, it was proposed that the condensation of heterochromatin functions  
498 is involved in the maintenance of transcriptional gene silencing and is a barrier to DNA  
499 replication initiation and possibly endoreduplication (Raynaud et al., 2014).

500 This study uncovers a newfound role for *SIZFP2* (Soly07g006880) as a critical  
501 player in tomato LT morphogenesis. Within *zfp2-c* lines, we observed deregulations in  
502 genes related to metabolism, hormonal pathways, and chromatin structure, alongside  
503 alterations in LT histology and cellular dynamics. Notably, the most significant impact was  
504 on cell division and subsequent alterations in endoreduplication processes, ultimately  
505 shaping the final LT structure in *zfp2-c* lines. These findings significantly enhance our  
506 understanding of tomato LT morphogenesis, providing valuable insights into the  
507 underlying mechanisms at play and the involvement of the C2H2 zinc finger *SIZFP2*.

## 508 MATERIAL AND METHODS

### 509 Tomato culture

510 Plants (*Solanum lycopersicum*) were grown in a greenhouse as previously described  
511 (Rothan et al., 2016). Flowers were shaken and tagged at anthesis. Crosses between  
512 genotypes were performed by substitution of the anther cone from an emasculated  
513 immature flower of the mother plant with a mature anther cone harvested on the male  
514 plant.

### 515 Generation of *Pro<sub>35S</sub>:F-BOX<sup>RNAi</sup>* transgenic lines

516 The RNAi-mediated silencing of the tomato *Soly10g080610* F-box gene was obtained  
517 by stable transformation of tomato cv Micro-Tom as already described (Fernandez et al.,  
518 2009), using *Soly10g080610* 3'-UTR specific amplicon (primers in Supplemental Table  
519 S3) introduced as an inverted repeat under the control of the constitutive 35S promoter  
520 into the Gateway destination vector pK7GWIWG2. Four independent diploid *Pro<sub>35S</sub>:F-*

521 *BOX<sup>RNAi</sup>* T0 transgenic lines (L-2, L-4, L-5 and L-7) harbouring 3:1 kanamycin (150 µg/mL)  
522 resistance segregation in the progeny were selected for further analyses. The gel-less  
523 phenotype was present only in the progeny of L-2.

#### 524 **Classic genetic mapping of the *gel-less* mutation in an outcrossing population**

525 A mapping F2 population of 93 plants was generated by crossing the homozygous  
526 *Pro<sub>35S</sub>:Solyc10g080610<sup>RNAi</sup>* L-2.2 T2 plant with a M82 dwarf genotype from the EMS-  
527 induced M82 cultivar mutant population (Menda et al., 2004). For each F2 plant, fruits  
528 were phenotyped for the gel-less trait and genomic DNA was extracted. Twenty-four  
529 SNPs on the 12 tomato chromosomes (2 SNPs/chromosomes) identified in previous work  
530 (Petit et al., 2014) were used as markers in Kompetitive allele-specific PCR (KASP)  
531 genotyping assays to correlate genotype and phenotype. Six additional SNPs well  
532 distributed on Ch07 exhibiting association with the gel-less phenotype were further  
533 genotyped.

#### 534 **Mapping-by-sequencing of the *gel-less* mutation in selfing population**

535 A S1 population of 114 plants segregating for the gel-less phenotype was produced by  
536 self-pollination of a heterozygous Micro-Tom *gel-less* mutant T2 plant (line L-2.10). WT-  
537 like and mutant-like bulks were constituted based on the gel-less phenotype for further  
538 whole genome sequencing. Attention was paid to exclude the S1 individuals (76%)  
539 presenting the transgene insertion unlinked to the gel-less phenotype. Indeed, the  
540 transgene insertion was determined on Ch09 in the parental gel-less mutant T2 plant by  
541 inverse PCR and specific primers were used to genotype the presence of this transgene  
542 insertion in the S1 population (Supplemental Table S2, S3). Because of the small number  
543 of remaining S1 plants (24%), S1 offsprings were used to constitute the bulks. An equal  
544 amount of leaf from 45 S2 plants (descendant from five S1 plants) was pooled for the  
545 WT-like and 27 S2 plants (descendant from five S1 plants) for the mutant-like bulk. The  
546 WT-like bulk was enriched in homozygous WT allele by selecting S1 progenies that did  
547 not segregate for the *gel-less* phenotype. Genomic DNA was extracted as previously  
548 described (Garcia et al., 2016) and sequencing was performed with an Illumina HiSeq  
549 2000 sequencer operating in a 100-bp paired-end run mode at the INRA-GeT-PlaGe-  
550 GENOTOUL platform. Raw fastq files were mapped to the tomato Micro-Tom genome  
551 version *Sol\_mic\_1.0* ([https://www.ncbi.nlm.nih.gov/assembly/GCA\\_012431665.1/](https://www.ncbi.nlm.nih.gov/assembly/GCA_012431665.1/);  
552 PRJNA553986; GBF Laboratory, Toulouse, personal communication) using BWA MEM,

553 and alignment visualization was performed using IGV V.2.9.2 interactive genome  
554 visualization tool (Robinson et al., 2011).

### 555 **CRISPR/Cas9-engineered mutant lines**

556 CRISPR/Cas9 mutants of *Solyc07g006880* were produced using either a single guide to  
557 induce ponctual mutations after the C2H2 and basic conserved domains of *SIZFP2*  
558 coding sequence or double guides designed nearby the ATG and the stop codons to  
559 induce large deletions within *SIZFP2* (Supplemental Fig. S3, Supplemental Table S3).  
560 The pEn-Chimera (sgRNA) entry vector and pDe-CAS9 (*Streptococcus pyogenes*  
561 nuclease) destination vector were used as described in Musseau et al. (2020) for single  
562 guide design, and a binary vector was produced as described by Bollier et al. (2018) for  
563 double guide design. Twelve independent diploid T0 transformant plants were  
564 regenerated after agrobacterium-mediated tomato transformation of Micro-Tom  
565 cotyledons (Fernandez et al., 2009). Single-copy T-DNA insertion lines were selected by  
566 a segregation test of kanamycin (150 µg/L) resistance of T1 plants. The CRISPR  
567 mutations present in *SIZFP2* gene in the T1 plants were genotyped by Sanger sequencing  
568 (Supplemental Table S3). Two independent homozygous CRISPR-sg lines (c-2.5 and c-  
569 11.5) and two independent CRISPR-dg lines (c-2.11 and c-4.1) were used in this study  
570 (Supplemental Fig. S3).

### 571 **Fruit tissue relative proportions**

572 Production was limited to six growing fruits per Micro-Tom plants. The relative proportions  
573 of the pericarp (%P), radial pericarp (%RP), LT (%LT) and columella (%C) tissues were  
574 determined on equatorial sections of fresh fruits acquired with an axiozoom imager or a  
575 camera and analyzed using Tomato Analyser 3.0 R software (Rodríguez et al., 2010).

### 576 **Histological analyses**

577 Histological analyses were carried out on 2-3 mm thick equatorial sections of whole (0 to  
578 8 DPA) or halved fruits (10 to 25 DPA) previously fixed in a formaldehyde acetic acid  
579 solution (ethanol/formaldehyde/acetic acid 18/1/1, v/v/v). Thin cuts (from 50 to 150 µm)  
580 were performed using a vibrating blade microtome (Microm HM 650V ®, Thermo  
581 Scientific). Sections were labelled using calcofluor white and propidium iodide as  
582 previously described (Musseau et al., 2020), mounted in the presence of CitiFluor™ AF1  
583 solution (Thermo Fisher Scientific) and observed under a confocal microscope (FEG  
584 GeminiSEM 300, Zeiss) at the Bordeaux Imaging Center (BIC; <http://www.bic.u->

585 bordeaux.fr/). Image acquisitions were analyzed using ImageJ® V.2.11.0 processing  
586 software. Histological parameters were estimated on the pericarp and LT by delimiting  
587 tissues as shown in Supplemental Fig. S6 and as previously described (Sun et al., 2015;  
588 Renaudin et al., 2017).

### 589 **Ploidy analysis**

590 Cell ploidy quantification was performed by flow cytometry (CyFlow Space®, Partec,  
591 Sysmex) on tomato fruit equatorial samples from the ovary to breaker stage, following the  
592 tissue dissections described in Supplemental Fig. S7. The Endoreduplication Factor (EF)  
593 was calculated as described elsewhere (Bertin et al., 2009).

### 594 **RT-qPCR gene expression analysis**

595 DNA-free RNA was isolated with NucleoSpin® RNA Plant and Fungi Kit as recommended  
596 by the manufacturer (MACHEREY-NAGEL) and used as template for reverse  
597 transcription as previously described (Lemaire-Chamley et al., 2022). For the  
598 developmental kinetics, samples were harvested as described in Supplemental Fig.S7.  
599 RT-qPCR was performed using gene-specific primers (Supplemental Table S3) using  
600 Promega Go Taq® qPCR Master Mix on a Light Cycler 480 II® (Roche) thermocycler.  
601 Relative expression changes were calculated according to the  $\Delta\Delta CT$  method using Eif4a  
602 housekeeping gene. Three biological and three technical replicates were performed per  
603 point. For other expression analyses, RT-qPCR were performed on a CFX-96 (Bio-Rad)  
604 implemented with the CFX manager software (version 2.0.885.0923, Biorad) for data  
605 acquisition and analysis. Actin and Eif4a were used as housekeeping genes to calculate  
606 the relative expression changes according to the  $\Delta\Delta CT$  method.

### 607 **Laser Microdissection and RNAseq sequencing**

608 Fruit sample preparation and laser microdissection were performed essentially as  
609 described by Martin et al. (2016). Briefly, after ethanol/acid acetic fixation, 4 DPA fruit  
610 equatorial cubes (3x3x4 mm) were embedded in optimal cutting temperature (OCT)  
611 medium and snap-frozen in liquid nitrogen. Sixteen-micrometer cryosections were  
612 prepared using a CM3050 S cryostat (Leica Microsystems, Wetzlar, Germany) and  
613 mounted on CryoJane CFSA 1/2 adhesive-coated glass slides (Leica) at the laser  
614 microdissection platform from Bordeaux Neurocentre Magendie ([https://neurocentre-  
615 magendie.fr/](https://neurocentre-magendie.fr/)). After slide fixation and dehydration, laser microdissection was performed  
616 with a PALM MicroBeam microdissection system version 4.6 equipped with the P.A.L.M.

617 RoboSoftware (Zeiss, Jena, Germany). Each of the two LT domes biological replicates  
618 were collected for the WT and *zfp2-c11.5* genotypes (respectively ~9 and 6<sup>10</sup> μm<sup>2</sup> total  
619 areas) from sections of six independent fruits. Total RNA was isolated using the RNeasy  
620 Plus Micro kit (Qiagen) and RNA amplification was performed using the Arcturus®  
621 RiboAmp® HS PLUS RNA Amplification Kit (Applied Biosystems) with two rounds of  
622 amplification. Strand specific RNA-seq libraries were prepared using the TruSeqStranded  
623 Kit omitting the poly(A) selection step and adding three rounds of PCR amplification  
624 before pair-end sequencing (2x150 pb) on the HiSeq3000 platform at the Toulouse  
625 Genome & Transcriptome core facilities (<http://get.genotoul.fr/>).

## 626 **Read mapping and transcript profiling**

627 Raw RNA-Seq reads were aligned against the tomato Heinz genome reference SL 4.00  
628 (<https://solgenomics.net/>) using STAR aligner v2.7.5a (Dobin et al., 2013). Aligned reads  
629 with a mapping quality above 10 were kept and counts of reads per genes were obtained  
630 using featureCounts program (Liao et al., 2014) based on iTAG4.0 gene models  
631 (<https://solgenomics.net/>). Differential gene expression analysis was performed with  
632 DESeq2 (Love et al., 2014) on the 16210 genes presenting at least 5 reads in both  
633 biological replicates from at least one genotype. Genes with an adjusted p-value<0.01  
634 were considered up- or down-regulated in *zfp2-c11.5* compared to the WT.

635 Blast2GO (Conesa et al., 2005) and Mercator (Mercator4 v5.0,  
636 <https://www.plabipd.de/>) annotation tools were used to generate an accurate functional  
637 annotation of the 16210 genes analysed in this work. Enrichment of specific annotations  
638 among the up- or down-regulated genes was evaluated using the clusterprofiler R  
639 package (Wu et al., 2021). Annotations with a BH-adjusted p-value<0.01 were considered  
640 as significantly enriched.

641 De novo search for enriched motifs in the promoters (1kb upstream of the TSS) of  
642 genes upregulated in *zfp2* mutant was performed using the peak motifs tool from  
643 Regulatory Sequence Analysis Tools (RSAT, PMID: 29722874) by searching for the top  
644 five most enriched 6, 7 or 8nt oligomers (oligo-analysis). A set of 2163 control promoters  
645 extracted from non-differentially expressed genes (p-value > 0.8, fold-change < 10%) was  
646 used as control. The 15 motifs obtained were clustered using the matrix-clustering tool  
647 from RSAT to obtain 8 core motifs that were further trimmed by removing low informative  
648 nucleotides (information content <0.6) from both sides of the core motifs. Each core motif  
649 was then searched in the 1 Kb proximal promoters of all genes using a minimum



650 alignment score of 90% or 100% using R/Bioconductor matchPWM function. The  
651 enrichment of the motifs in the promoters of the genes upregulated in *zfp2* mutant were  
652 compared to their enrichment in 10000 random samples of promoters in the genome. In  
653 addition, we performed a similar search using motifs with randomly permuted nucleotides,  
654 in order to account for potential sequence content biases.

## 655 **Model of LT morphogenesis**

656 The division/endoreduplication module of the model originally presented by Bertin et al.  
657 (2007) and further developed by Baldazzi et al. (2019) for fruit pericarp growth was used  
658 to model LT morphogenesis. We simulated the dynamics of the number of cells of the LT  
659 belonging to each carpel, and their ploidy. The total surface of the domes in each carpel  
660 collected for the histological study was used as a reference surface. The number of cells  
661 of the LT of each carpel was computed as the product of the area of this reference surface  
662 and the average cell density in the LT domes, recovered from the image analysis. We  
663 used the multi-objective algorithm NSGA2 (Deb et al., 2002) to estimate the values of  
664 eight model parameters, describing the initial number of cells in the tissue ( $n_0$ , -), the time  
665 ( $\tau$ , h) and the fraction ( $\theta_0$ ,  $\theta_m$ ,  $a$ ,  $b$ , -) of cells entering division, the time ( $\tau_{E0}$ , h) and the  
666 fraction ( $\sigma$ , -) of cells entering endoreduplication. We minimized two cost functions,  
667 derived from an inversed log-likelihood function following Zaffaroni et al., (2020)  
668 computed for respectively the number of cells ( $C_n$ ) and the percentage of 2C and 4C  
669 ploidy cells ( $C_p$ ) as follows:

$$670 \quad C_{n,p} = - \left( -N_{i,(n,p)} \log \left( \sqrt{2\pi\sigma_{i,(n,p)}^2} \right) - \frac{1}{2\sigma_{i,(n,p)}^2} \text{SSE}_{(n,p)} \right)$$

671 where  $N_i$  is the number of observed number of cells in each carpel or percentage of cells  
672 in 2C and 4C ploidy,  $\sigma_i^2$  is the variance of the residuals of the simulated vs observed  
673 values, and SSE is the sum of squared error between simulated and observed values.  
674 The cost functions were computed on the data of WT and the two *zfp-c* lines for three  
675 different hypotheses: “Division only is different”: the parameters describing the division  
676 were different among genotypes while the endoreplication-related parameters were kept  
677 the same, “Endoreplication only is different”: the endoreplication-related parameters were  
678 different among genotypes while the division-related were the same, and “Division and  
679 endoreplication are different”: all the parameters were different among the genotypes.

680 For each hypothesis, we conducted 20 repetitions of the NSGAI algorithm with  
681 100 generations and a population size of 24. Therefore, each repetition provided a set of  
682 24 parameter combinations whose corresponding cost functions belonged to a set of  
683 Pareto-dominant solutions. For each hypothesis, we selected 25 solutions to find the best  
684 compromise between the two objectives: under the constraints  $C_N \leq 930$ ,  $C_P \leq 88$ , for each  
685 hypothesis, we kept the top 25 solutions of the vector  $C_N + C_P$  (Supplemental Fig. S11).

686 To evaluate the model fit for the different variables (number of cells, percentage of cells  
687 in a given ploidy), we computed the NRMSE criterion as:

$$688 \quad NRMSE = \frac{1}{E(O_i)} \cdot \sqrt{\frac{SSE}{N_i}}$$

689 where  $E(O_i)$  is the average of the observed variables.

## 690 **Statistical analyses**

691 Statistical analyses were performed with BioStatFlow v.2.9.5 web application, based on  
692 R statistical scripts (<http://biostatflow.org>). Data sets were mean-centered and scaled to  
693 unit variance before any statistical test. Mean comparison tests were performed using a  
694 Wilcoxon test with a false discovery rate adjusted p-value threshold set to 0.05 (Benjamini  
695 and Hochberg, 1995)

## 696 **Acknowledgements**

697 We thank the Plant Unit of Bordeaux Imaging Center and the Laser Microdissection  
698 Plateforme from the Magendie Neurocentre and respectively Lysiane Brocard and  
699 Marlène Maitre for support, Nicolas Viron, for the generation of the *zfp-i* mutant, the  
700 License and Master students, Benjamin Noihlan, Florent Fontaine and Gabriel  
701 Domenech, for help in the characterization of the mutants and Fabienne Wong and  
702 Sylvain Prigent for exploratory analyses of the WGS and RNAseq data. We are grateful  
703 to Michel Hernould who shared his protocol for fruit sample fixation, inclusion and  
704 staining, to Olivier LePrince and Julia Buitink their protocol for seed germination and to  
705 Jean-Michel Davière for helpful discussion and critical reading of the manuscript.

## 706 **Author Contributions**

707 M.L.-C., L.F.-L. and C.R. conceived and designed the research. J.J. and M.L.-C.  
708 performed the phenotypical and molecular characterization of the *zfp-i* mutant and  
709 segregating population and produced the CRISPR lines. J.-P.M. and C.B. performed the  
710 genetical mapping of the *gel-less* locus in *zfp-i* x M82 F2 population. V.G. performed the  
711 WGS analysis. G.H. performed the phenotypical, histological and molecular  
712 characterization of the CRISPR lines. D.C. and N.B. performed the model calibration and  
713 simulation. S.G. and M.-L.C performed the seed characterization. J.J performed the laser  
714 microdissection. P.G.P.M. performed the transcriptome analysis. M.L.-C. and G.H.  
715 analyzed the data and wrote the publication with the input of all other authors and  
716 significant discussion and revision from L. F.-L and N. G. All authors read and approved  
717 the manuscript.

## 718 **Supplemental data**

719 The following materials are available in the online version of this article.

720 **Supplemental Figure S1.** Summary of the workflow leading to the identification of the  
721 *gel-less* causal mutation.

722 **Supplemental Figure S2.** Sequence of *zfp2-i* allele and primers used for its analysis.

723 **Supplemental Figure S3.** Primary structure of *SIZFP2* protein and effect of CRISPR  
724 mutations on the predicted protein sequence and mRNA level.

725 **Supplemental Figure S4.** Plant Development in the WT and *zfp2-c* lines.

726 **Supplemental Figure S5.** Seed phenotype and germination in the WT and *zfp2-c* lines.

727 **Supplemental Figure S6.** Representation of the delineation of the tissues of interest on  
728 confocal images.

729 **Supplemental Figure S7.** Delineation of the samples harvested for ploidy and RT-qPCR  
730 analyses.

731 **Supplemental Figure S8.** Individual ploidy level in WT and *zfp2-c* lines during locular  
732 tissue differentiation.

733 **Supplemental Figure S9.** Pericarp cellular parameters in WT and *zfp2-c* lines during fruit  
734 growth.

735 **Supplemental Figure S10.** Ploidy of fruit dissected tissues in WT and *zfp2-c* lines at 25  
736 DPA.

737 **Supplemental Figure S 11.** Calibration of the locular tissue growth model.

738 **Supplemental Figure S12.** Comparative expression of *SIZFP2* and *SIMBP3*.

739 **Supplemental Table S1.** Global reproductive characteristics in the *gel-less* mutant  
740 compared to WT-like siblings from Micro-Tom.

741 **Supplemental Table S2.** Summary of the phenotype and genotype of  
742 *Pro<sub>35S</sub>:Solyc10g080610<sup>RNAi</sup>-L2.10* T2 siblings.

743 **Supplemental Table S3.** List of primers used in this study.

744 **Supplemental Table S4.** Developmental kinetic and physiological traits of RR fruits in  
745 the WT and *zfp-c* lines.

746 **Supplemental Table S5.** List of the 1136 DEG in *zfp2-c11* locular tissue domes  
747 compared to the WT.

748 **Supplemental Table S6.** List of the metabolism-related genes down-regulated in *zfp2-*  
749 *c11* LT domes compared to the WT.

750 **Supplemental Table S7.** List of Cell-Wall-related DEG in *zfp2-c11* LT domes compared  
751 to the WT.

752 **Supplemental Table S8.** List of the Hormone-related DEG in *zfp2-c11* LT domes  
753 compared to the WT.

754 **Supplemental Table S9.** List of the RNA regulation-related genes up-regulated in *zfp2-*  
755 *c11* LT domes compared to the WT.

756 **Supplemental Table S10.** Occurrence of the enriched clusters in the promoters of the  
757 genes up-regulated in *zfp2-c11* LT domes compared to the WT.

758 **Funding**

759 This work was supported by Région Nouvelle-Aquitaine [Con. 00002451 22BHTOMAT]  
760 (G.H.), the Plant Biology and Breeding Division of INRAE (G.H) and INRAE-BAP Coeur  
761 de Fruit.

## 762 **Disclosures**

763 The authors have no conflict of interest to declare.

## 764 **References**

- 765 **Ariizumi T, Shinozaki Y, Ezura H** (2013) Genes that influence yield in tomato. *Breed Sci*  
766 **63**: 3–13
- 767 **Azzi L, Deluche C, Gévaudant F, Frangne N, Delmas F, Hernould M, Chevalier C**  
768 (2015) Fruit growth-related genes in tomato. *J Exp Bot* **66**: 1075–1086
- 769 **Baldazzi V, Valsesia P, Génard M, Bertin N** (2019) Organ-wide and ploidy-dependent  
770 regulation both contribute to cell-size determination: evidence from a  
771 computational model of tomato fruit. *J Exp Bot* **70**: 6215–6228
- 772 **Benjamini Y, Hochberg Y** (1995) Controlling the False Discovery Rate: A Practical and  
773 Powerful Approach to Multiple Testing. *J R Stat Soc* **57**: 289–300
- 774 **Berry T, Bewley JD** (1992) A Role for the Surrounding Fruit Tissues in Preventing the  
775 Germination of Tomato (*Lycopersicon esculentum*) Seeds 1: A Consideration of  
776 the Osmotic Environment and Abscisic Acid. *Plant Physiol* **100**: 951–957
- 777 **Berry T, Bewley JD** (1993) Comparisons between the roles of the fruit tissues,  
778 osmoticum and abscisic acid in maintaining tomato seed development and storage  
779 protein synthesis. *Seed Sci Res* **3**: 25–34
- 780 **Bertin N, Causse M, Brunel B, Tricon D, Génard M** (2009) Identification of growth  
781 processes involved in QTLs for tomato fruit size and composition. *J Exp Bot* **60**:  
782 237–248
- 783 **Bertin N, Lecomte A, Brunel B, Fishman S, Génard M** (2007) A model describing cell  
784 polyploidization in tissues of growing fruit as related to cessation of cell  
785 proliferation. *J Exp Bot* **58**: 1903–1913
- 786 **Bollier N, Sicard A, Leblond J, Latrasse D, Gonzalez N, Gévaudant F, Benhamed M,**  
787 **Raynaud C, Lenhard M, Chevalier C, et al** (2018) At-MINI ZINC FINGER2 and  
788 SI-INHIBITOR OF MERISTEM ACTIVITY, a Conserved Missing Link in the  
789 Regulation of Floral Meristem Termination in Arabidopsis and Tomato. *Plant Cell*  
790 **30**: 83–100
- 791 **Bourdon M, Pirrello J, Cheniclet C, Coriton O, Bourge M, Brown S, Moïse A,**  
792 **Peypelut M, Rouyère V, Renaudin J-P, et al** (2012) Evidence for karyoplasmic  
793 homeostasis during endoreduplication and a ploidy-dependent increase in gene  
794 transcription during tomato fruit growth. *Development* **139**: 3817–3826
- 795 **Cheniclet C, Rong WY, Causse M, Frangne N, Bolling L, Carde J-P, Renaudin J-P**  
796 (2005) Cell expansion and endoreduplication show a large genetic variability in

- 797 pericarp and contribute strongly to tomato fruit growth. *Plant Physiol* **139**: 1984–  
798 1994
- 799 **Chevalier C, Nafati M, Mathieu-Rivet E, Bourdon M, Frangne N, Cheniclet C,**  
800 **Renaudin J-P, Gévaudant F, Hernould M** (2011) Elucidating the functional role  
801 of endoreduplication in tomato fruit development. *Ann Bot* **107**: 1159–1169
- 802 **Conesa A, Götz S, García-Gómez JM, Terol J, Talón M, Robles M** (2005) Blast2GO:  
803 a universal tool for annotation, visualization and analysis in functional genomics  
804 research. *Bioinformatics* **21**: 3674–3676
- 805 **Deb K, Pratap A, Agarwal S, Meyarivan T** (2002) A fast and elitist multiobjective genetic  
806 algorithm: NSGA-II. *IEEE Trans Evol Comput* **6**: 182–197
- 807 **Dobin A, Davis CA, Schlesinger F, Drenkow J, Zaleski C, Jha S, Batut P, Chaisson**  
808 **M, Gingeras TR** (2013) STAR: ultrafast universal RNA-seq aligner. *Bioinformatics*  
809 **29**: 15–21
- 810 **Engbrecht CC, Schoof H, Böhm S** (2004) Conservation, diversification and expansion  
811 of C2H2 zinc finger proteins in the *Arabidopsis thaliana* genome. *BMC Genomics*  
812 **5**: 39
- 813 **Erdmann RM, Picard CL** (2020) RNA-directed DNA Methylation. *PLoS Genet* **16**:  
814 e1009034
- 815 **Fenn MA, Giovannoni JJ** (2021) Phytohormones in fruit development and maturation.  
816 *Plant J* **105**: 446-458
- 817 **Fernandez AI, Viron N, Alhaghdow M, Karimi M, Jones M, Amsellem Z, Sicard A,**  
818 **Czerednik A, Angenent G, Grierson D, et al** (2009) Flexible tools for gene  
819 expression and silencing in tomato. *Plant Physiol* **151**: 1729–1740
- 820 **Galindo-González L, Mhiri C, Deyholos MK, Grandbastien M-A** (2017) LTR-  
821 retrotransposons in plants: Engines of evolution. *Gene* **626**: 14–25
- 822 **Garcia V, Bres C, Just D, Fernandez L, Tai FWJ, Mauxion J-P, Le Paslier M-C, Bérard**  
823 **A, Brunel D, Aoki K, et al** (2016) Rapid identification of causal mutations in tomato  
824 EMS populations via mapping-by-sequencing. *Nat Protoc* **11**: 2401–2418
- 825 **Gillaspy G, Ben-David H, Gruissem W** (1993) Fruits: A Developmental Perspective.  
826 *Plant Cell* **5**: 1439–1451
- 827 **Giovannoni J, Nguyen C, Ampofo B, Zhong S, Fei Z** (2017) The Epigenome and  
828 Transcriptional Dynamics of Fruit Ripening. *Annu Rev Plant Biol* **68**: 61–84
- 829 **Goetz M, Hooper LC, Johnson SD, Rodrigues JCM, Vivian-Smith A, Koltunow AM**  
830 (2007) Expression of aberrant forms of AUXIN RESPONSE FACTOR8 stimulates  
831 parthenocarp in *Arabidopsis* and tomato. *Plant Physiol* **145**: 351–366
- 832 **Hu J, Israeli A, Ori N, Sun T-P** (2018) The Interaction between DELLA and ARF/IAA  
833 Mediates Crosstalk between Gibberellin and Auxin Signaling to Control Fruit  
834 Initiation in Tomato. *Plant Cell* **30**: 1710–1728
- 835 **Hu J, Li X, Sun T-P** (2023) Four class A AUXIN RESPONSE FACTORs promote tomato



- 836 fruit growth despite suppressing fruit set. *Nat Plants* **9**: 706–719
- 837 **Hu X, Zhu L, Zhang Y, Xu L, Li N, Zhang X, Pan Y** (2019) Genome-wide identification  
838 of C2H2 zinc-finger genes and their expression patterns under heat stress in  
839 tomato (*Solanum lycopersicum* L.). *PeerJ* **7**: e7929
- 840 **Huang B, Hu G, Wang K, Frasse P, Maza E, Djari A, Deng W, Pirrello J, Burlat V,**  
841 **Pons C, et al** (2021) Interaction of two MADS-box genes leads to growth  
842 phenotype divergence of all-flesh type of tomatoes. *Nat Commun* **12**: 6892
- 843 **Ishida T, Adachi S, Yoshimura M, Shimizu K, Umeda M, Sugimoto K** (2010) Auxin  
844 modulates the transition from the mitotic cycle to the endocycle in *Arabidopsis*.  
845 *Development* **137**: 63–71
- 846 **de Jong M, Wolters-Arts M, Feron R, Mariani C, Vriezen WH** (2009) The *Solanum*  
847 *lycopersicum* auxin response factor 7 (SIARF7) regulates auxin signaling during  
848 tomato fruit set and development. *Plant J* **57**: 160–170
- 849 **Joubès J, Chevalier C** (2000) Endoreduplication in higher plants. *Plant Mol Biol* **43**: 735–  
850 745
- 851 **Joubès J, Phan TH, Just D, Rothan C, Bergounioux C, Raymond P, Chevalier C**  
852 (1999) Molecular and biochemical characterization of the involvement of cyclin-  
853 dependent kinase A during the early development of tomato fruit. *Plant Physiol*  
854 **121**: 857–869
- 855 **Joubès J, Walsh D, Raymond P, Chevalier C** (2000) Molecular characterization of the  
856 expression of distinct classes of cyclins during the early development of tomato  
857 fruit. *Planta* **211**: 430–439
- 858 **Kagale S, Rozwadowski K** (2011) EAR motif-mediated transcriptional repression in  
859 plants: An underlying mechanism for epigenetic regulation of gene expression.  
860 *Epigenetics* **6**: 141–146
- 861 **Kim J-S, Lee J, Ezura H** (2022) SIMBP3 Knockout/down in Tomato: Normal-Sized Fruit  
862 with Increased Dry Matter Content through Non-Liquefied Locular Tissue by  
863 Altered Cell Wall Formation. *Plant Cell Physiol* **63**: 1485–1499
- 864 **Klee HJ, Giovannoni JJ** (2011) Genetics and control of tomato fruit ripening and quality  
865 attributes. *Annu Rev Genet* **45**: 41–59
- 866 **Lemaire-Chamley M, Koutouan C, Jorly J, Assali J, Yoshida T, Nogueira M, Tohge**  
867 **T, Ferrand C, Peres LEP, Asamizu E, et al** (2022) A Chimeric TGA Repressor  
868 Slows Down Fruit Maturation and Ripening in Tomato. *Plant Cell Physiol* **63**: 120–  
869 134
- 870 **Lemaire-Chamley M, Mounet F, Deborde C, Maucourt M, Jacob D, Moing A** (2019)  
871 NMR-Based Tissue and Developmental Metabolomics of Tomato Fruit.  
872 *Metabolites* **9**: E93
- 873 **Lemaire-Chamley M, Petit J, Garcia V, Just D, Baldet P, Germain V, Fagard M,**  
874 **Mouassite M, Cheniclet C, Rothan C** (2005) Changes in transcriptional profiles  
875 are associated with early fruit tissue specialization in tomato. *Plant Physiol* **139**:  
876 750–769

- 877 **Li S, Chen K, Grierson D** (2021) Molecular and Hormonal Mechanisms Regulating  
878 Fleshy Fruit Ripening. *Cells* **10**: 1136
- 879 **Liao Y, Smyth GK, Shi W** (2014) featureCounts: an efficient general purpose program  
880 for assigning sequence reads to genomic features. *Bioinformatics* **30**: 923–930
- 881 **Liu S, Zhang Y, Feng Q, Qin L, Pan C, Lamin-Samu AT, Lu G** (2018) Tomato AUXIN  
882 RESPONSE FACTOR 5 regulates fruit set and development via the mediation of  
883 auxin and gibberellin signaling. *Sci Rep* **8**: 2971
- 884 **Love MI, Huber W, Anders S** (2014) Moderated estimation of fold change and dispersion  
885 for RNA-seq data with DESeq2. *Genome Biol* **15**: 550
- 886 **Ma Y, Kanakousaki K, Buttitta L** (2015) How the cell cycle impacts chromatin  
887 architecture and influences cell fate. *Front Genet* **6**: 19
- 888 **Martin LBB, Nicolas P, Matas AJ, Shinozaki Y, Catalá C, Rose JKC** (2016) Laser  
889 microdissection of tomato fruit cell and tissue types for transcriptome profiling. *Nat*  
890 *Protoc* **11**: 2376–2388
- 891 **Mathieu-Rivet E, Gévaudant F, Cheniclet C, Hernould M, Chevalier C** (2010a) The  
892 Anaphase Promoting Complex activator CCS52A, a key factor for fruit growth and  
893 endoreduplication in Tomato. *Plant Signal Behav* **5**: 985–987
- 894 **Mathieu-Rivet E, Gévaudant F, Sicard A, Salar S, Do PT, Mouras A, Fernie AR,**  
895 **Gibon Y, Rothan C, Chevalier C, et al** (2010b) Functional analysis of the  
896 anaphase promoting complex activator CCS52A highlights the crucial role of endo-  
897 reduplication for fruit growth in tomato. *Plant J* **62**: 727–741
- 898 **Mauxion J-P, Chevalier C, Gonzalez N** (2021) Complex cellular and molecular events  
899 determining fruit size. *Trends Plant Sci* **26**: 1023–1038
- 900 **McAtee P, Karim S, Schaffer R, David K** (2013) A dynamic interplay between  
901 phytohormones is required for fruit development, maturation, and ripening. *Front*  
902 *Plant Sci* **4**: 79
- 903 **Menda N, Semel Y, Peled D, Eshed Y, Zamir D** (2004) In silico screening of a saturated  
904 mutation library of tomato. *Plant J* **38**: 861–872
- 905 **Molesini B, Dusi V, Pennisi F, Pandolfini T** (2020) How Hormones and MADS-Box  
906 Transcription Factors Are Involved in Controlling Fruit Set and Parthenocarpy in  
907 Tomato. *Genes* **11**: 1441
- 908 **Mounet F, Moing A, Garcia V, Petit J, Maucourt M, Deborde C, Bernillon S, Le Gall**  
909 **G, Colquhoun I, Defernez M, et al** (2009) Gene and metabolite regulatory  
910 network analysis of early developing fruit tissues highlights new candidate genes  
911 for the control of tomato fruit composition and development. *Plant Physiol* **149**:  
912 1505–1528
- 913 **Mounet F, Moing A, Kowalczyk M, Rohrmann J, Petit J, Garcia V, Maucourt M, Yano**  
914 **K, Deborde C, Aoki K, et al** (2012) Down-regulation of a single auxin efflux  
915 transport protein in tomato induces precocious fruit development. *J Exp Bot* **63**:  
916 4901–4917

- 917 **Musseau C, Jorly J, Gadin S, Sørensen I, Deborde C, Bernillon S, Mauxion J-P,**  
918 **Atienza I, Moing A, Lemaire-Chamley M, et al** (2020) The Tomato Guanylate-  
919 Binding Protein SIGBP1 Enables Fruit Tissue Differentiation by Maintaining  
920 Endopolyploid Cells in a Non-Proliferative State. *Plant Cell* **32**: 3188–3205
- 921 **Musseau C, Just D, Jorly J, Gévaudant F, Moing A, Chevalier C, Lemaire-Chamley**  
922 **M, Rothan C, Fernandez L** (2017) Identification of Two New Mechanisms That  
923 Regulate Fruit Growth by Cell Expansion in Tomato. *Front Plant Sci* **8**: 988
- 924 **Pabón-Mora N, Litt A** (2011) Comparative anatomical and developmental analysis of dry  
925 and fleshy fruits of Solanaceae. *Am J Bot* **98**: 1415–1436
- 926 **Pattison RJ, Catalá C** (2012) Evaluating auxin distribution in tomato (*Solanum*  
927 *lycopersicum*) through an analysis of the PIN and AUX/LAX gene families. *Plant J*  
928 **70**: 585–598
- 929 **Petit J, Bres C, Just D, Garcia V, Mauxion J-P, Marion D, Bakan B, Joubès J,**  
930 **Domergue F, Rothan C** (2014) Analyses of tomato fruit brightness mutants  
931 uncover both cutin-deficient and cutin-abundant mutants and a new hypomorphic  
932 allele of GDSL lipase. *Plant Physiol* **164**: 888–906
- 933 **Quinet M, Angosto T, Yuste-Lisbona FJ, Blanchard-Gros R, Bigot S, Martinez J-P,**  
934 **Lutts S** (2019) Tomato Fruit Development and Metabolism. *Front Plant Sci* **10**:  
935 1554
- 936 **Raynaud C, Mallory AC, Latrasse D, Jégu T, Bruggeman Q, Delarue M, Bergounioux**  
937 **C, Benhamed M** (2014) Chromatin meets the cell cycle. *J Exp Bot* **65**: 2677–2689
- 938 **Razifard H, Ramos A, Della Valle AL, Bodary C, Goetz E, Manser EJ, Li X, Zhang L,**  
939 **Visa S, Tieman D, et al** (2020) Genomic Evidence for Complex Domestication  
940 History of the Cultivated Tomato in Latin America. *Mol Biol Evol* **37**: 1118–1132
- 941 **Reichardt I, Slane D, El Kasmi F, Knöll C, Fuchs R, Mayer U, Lipka V, Jürgens G**  
942 (2011) Mechanisms of functional specificity among plasma-membrane syntaxins  
943 in *Arabidopsis*. *Traffic* **12**: 1269–1280
- 944 **Renaudin J-P, Deluche C, Cheniclet C, Chevalier C, Frangne N** (2017) Cell layer-  
945 specific patterns of cell division and cell expansion during fruit set and fruit growth  
946 in tomato pericarp. *J Exp Bot* **68**: 1613–1623
- 947 **Robinson JT, Thorvaldsdóttir H, Winckler W, Guttman M, Lander ES, Getz G,**  
948 **Mesirov JP** (2011) Integrative genomics viewer. *Nat Biotechnol* **29**: 24–26
- 949 **Rodríguez GR, Moysenko JB, Robbins MD, Morejón NH, Francis DM, van der**  
950 **Knaap E** (2010) Tomato Analyzer: a useful software application to collect accurate  
951 and detailed morphological and colorimetric data from two-dimensional objects. *J*  
952 *Visualized Exp* 1856
- 953 **Rothan C, Just D, Fernandez L, Atienza I, Ballias P, Lemaire-Chamley M** (2016)  
954 Culture of the Tomato Micro-Tom Cultivar in Greenhouse. *Methods Mol Biol* **1363**:  
955 57–64
- 956 **Ruan Y-L, Patrick JW, Bouzayen M, Osorio S, Fernie AR** (2012) Molecular regulation  
957 of seed and fruit set. *Trends Plant Sci* **17**: 656–665

- 958 **Shinozaki Y, Ezura K, Hu J, Okabe Y, Bénard C, Prodhomme D, Gibon Y, Sun T,**  
959 **Ezura H, Ariizumi T** (2018) Identification and functional study of a mild allele of  
960 **SIDELLA** gene conferring the potential for improved yield in tomato. *Sci Rep* **8**:  
961 12043
- 962 **Sotelo-Silveira M, Marsch-Martínez N, de Folter S** (2014) Unraveling the signal  
963 scenario of fruit set. *Planta* **239**: 1147–1158
- 964 **Srivastava A, Handa AK** (2005) Hormonal Regulation of Tomato Fruit Development: A  
965 Molecular Perspective. *J Plant Growth Regul* **24**: 67–82
- 966 **Sun L, Rodriguez GR, Clevenger JP, Illa-Berenguer E, Lin J, Blakeslee JJ, Liu W,**  
967 **Fei Z, Wijeratne A, Meulia T, et al** (2015) Candidate gene selection and detailed  
968 morphological evaluations of fs8.1, a quantitative trait locus controlling tomato fruit  
969 shape. *J Exp Bot* **66**: 6471–6482
- 970 **Thimm O, Bläsing O, Gibon Y, Nagel A, Meyer S, Krüger P, Selbig J, Müller LA, Rhee**  
971 **SY, Stitt M** (2004) MAPMAN: a user-driven tool to display genomics data sets onto  
972 diagrams of metabolic pathways and other biological processes. *Plant J* **37**: 914–  
973 939
- 974 **Wang H, Jones B, Li Z, Frasse P, Delalande C, Regad F, Chaabouni S, Latché A,**  
975 **Pech J-C, Bouzayen M** (2005) The Tomato *Aux / IAA* Transcription Factor *IAA9*  
976 Is Involved in Fruit Development and Leaf Morphogenesis. *Plant Cell* **17**: 2676–  
977 2692
- 978 **Wang L, Ruan Y-L** (2013) Regulation of cell division and expansion by sugar and auxin  
979 signaling. *Front Plant Sci* **4**: 163
- 980 **Weng L, Zhao F, Li R, Xu C, Chen K, Xiao H** (2015) The Zinc Finger Transcription  
981 Factor *SIZFP2* Negatively Regulates Abscisic Acid Biosynthesis and Fruit  
982 Ripening in Tomato. *Plant Physiol* **167**: 931–949
- 983 **Wu T, Hu E, Xu S, Chen M, Guo P, Dai Z, Feng T, Zhou L, Tang W, Zhan L, et al**  
984 (2021) clusterProfiler 4.0: A universal enrichment tool for interpreting omics data.  
985 *Innovation (Camb)* **2**: 100141
- 986 **Wu X, Yu L, Pehrsson PR** (2022) Are Processed Tomato Products as Nutritious as Fresh  
987 Tomatoes? Scoping Review on the Effects of Industrial Processing on Nutrients  
988 and Bioactive Compounds in Tomatoes. *Adv Nutr* **13**: 138–151
- 989 **Xiao H, Radovich C, Welty N, Hsu J, Li D, Meulia T, van der Knaap E** (2009)  
990 Integration of tomato reproductive developmental landmarks and expression  
991 profiles, and the effect of SUN on fruit shape. *BMC Plant Biol* **9**: 49
- 992 **Xie M, Sun J, Gong D, Kong Y** (2019) The Roles of Arabidopsis C1-2i Subclass of C2H2-  
993 type Zinc-Finger Transcription Factors. *Genes* **10**: 653
- 994 **Zaffaroni M, Cunniffe NJ, Bevacqua D** (2020) An ecophysiological model of plant–pest  
995 interactions: the role of nutrient and water availability. *J R Soc* **17**: 20200356
- 996 **Zhang J, Wang Y, Naeem M, Zhu M, Li J, Yu X, Hu Z, Chen G** (2019) An AGAMOUS  
997 MADS-box protein, SIMBP3, regulates the speed of placenta liquefaction and  
998 controls seed formation in tomato. *J Exp Bot* **70**: 909–924

- 999 **Zhao T, Wu T, Zhang J, Wang Z, Pei T, Yang H, Li J, Xu X** (2020) Genome-Wide  
1000 Analyses of the Genetic Screening of C2H2-Type Zinc Finger Transcription  
1001 Factors and Abiotic and Biotic Stress Responses in Tomato (*Solanum*  
1002 *lycopersicum*) Based on RNA-Seq Data. *Front Genet* **11**: 540
- 1003 **Zheng F, Cui L, Li C, Xie Q, Ai G, Wang J, Yu H, Wang T, Zhang J, Ye Z, et al** (2022)  
1004 Hair interacts with SIZFP8-like to regulate the initiation and elongation of trichomes  
1005 by modulating SIZFP6 expression in tomato. *J Exp Bot* **73**: 228–244
- 1006

Table 1. List of Cell division, Chromatin organisation and Cytoskeleton organisation -related genes up-regulated in *zfp2-c11.5* locular tissue domes compared to the WT.

<sup>a</sup>Number of occurrences of the cluster in the promoter of the gene.

<sup>b</sup>Sum of the occurrences of Clusters 1 and 4 in the promoter of the gene.

| gene                          | log2FC<br>(CP/WT) | Adj. P<br>val | SGN Annotation                            | ITAG4.0 Mapman NAME          | C1 <sup>a</sup> | C4 <sup>a</sup> | Total<br>C <sup>b</sup> |
|-------------------------------|-------------------|---------------|-------------------------------------------|------------------------------|-----------------|-----------------|-------------------------|
| <b>Chromatin organisation</b> |                   |               |                                           |                              |                 |                 |                         |
| Solyc06g084090.4              | 0.64              | 2.5E-03       | Histone H2A                               | Chromatin structure          | 0               | 0               | 0                       |
| Solyc01g099410.3              | 0.75              | 3.4E-04       | Histone H2A                               | Chromatin structure          | 0               | 2               | 2                       |
| Solyc11g073260.2              | 0.94              | 6.7E-04       | Histone H2A                               | Chromatin structure          | 2               | 2               | 4                       |
| Solyc09g074300.1              | 1.16              | 8.7E-07       | Histone H2A                               | Chromatin structure          | 2               | 0               | 2                       |
| Solyc06g084430.4              | 1.35              | 2.9E-06       | Histone H2A                               | Chromatin structure          | 1               | 1               | 2                       |
| Solyc03g071620.2              | 0.61              | 8.8E-03       | Histone H2B                               | Chromatin structure          | 0               | 0               | 0                       |
| Solyc06g074790.2              | 1.01              | 4.0E-07       | Histone H2B                               | Chromatin structure          | 0               | 0               | 0                       |
| Solyc11g066430.2              | 1.22              | 6.2E-12       | histone H2B                               | Chromatin structure          | 0               | 1               | 1                       |
| Solyc05g051500.4              | 0.60              | 4.4E-03       | Histone H3                                | Chromatin structure          | 0               | 0               | 0                       |
| Solyc02g077480.1              | 0.87              | 1.2E-05       | Histone H3                                | Chromatin structure          | 0               | 1               | 1                       |
| Solyc10g008910.1              | 0.89              | 3.2E-06       | Histone H3                                | Chromatin structure          | 0               | 0               | 0                       |
| Solyc06g005420.1              | 0.67              | 6.0E-03       | Histone H4                                | Chromatin structure          | 0               | 1               | 1                       |
| Solyc11g072860.2              | 0.77              | 1.1E-03       | Histone H4                                | Chromatin structure          | 1               | 0               | 1                       |
| Solyc06g072240.1              | 0.81              | 1.8E-03       | Histone H4                                | Chromatin structure          | 0               | 1               | 1                       |
| Solyc04g011390.1              | 0.81              | 5.2E-04       | Histone H4                                | Chromatin structure          | 1               | 1               | 2                       |
| Solyc11g066160.1              | 0.81              | 4.6E-03       | Histone H4                                | Chromatin structure          | 0               | 0               | 0                       |
| Solyc11g072840.1              | 1.22              | 3.5E-04       | Histone H4                                | Chromatin structure          | 0               | 3               | 3                       |
| Solyc02g084240.3              | 1.08              | 7.3E-05       | H1 histone-like protein                   | Chromatin structure          | 2               | 1               | 3                       |
| Solyc04g008820.3              | 0.87              | 3.4E-03       | High mobility group B protein 7           | Chromatin structure          | 1               | 1               | 2                       |
| Solyc03g121580.3              | 0.82              | 5.4E-04       | WD-40 repeat-containing protein MSI4-like | Histone chaperone activities | 0               | 0               | 0                       |
| Solyc04g079930.3              | 0.70              | 2.5E-03       | Histone deacetylase complex subunit       | Histone acetylation          | 1               | 1               | 2                       |
| Solyc11g006230.3              | 2.33              | 7.1E-06       | GRF1-interacting factor 1                 | Nucleosome remodeling        | 4               | 0               | 4                       |



|                                  |      |         |                                                  |                                                  |   |   |   |
|----------------------------------|------|---------|--------------------------------------------------|--------------------------------------------------|---|---|---|
| Solyc02g082290.4                 | 1.28 | 7.7E-06 | Histidine kinase-like ATPase domain, MORC        | DNA methylation.RdDM pathway                     | 0 | 2 | 2 |
| Solyc06g082390.4                 | 0.73 | 7.5E-04 | RNA-directed DNA methylation, RDM4               | DNA methylation.RdDM pathway                     | 2 | 0 | 2 |
| Solyc03g120940.4                 | 2.50 | 1.9E-03 | SAWADEE HOMEODOMAIN protein, SHH                 | DNA methylation.RdDM pathway                     | 0 | 1 | 1 |
| <b>Cell Division</b>             |      |         |                                                  |                                                  |   |   |   |
| Solyc01g087500.3                 | 0.89 | 1.1E-03 | DNA topoisomerase, TOP2                          | DNA replication                                  | 2 | 1 | 3 |
| Solyc05g053520.3                 | 1.64 | 7.1E-05 | DNA polymerase delta subunit, POLD4              | DNA replication                                  | 0 | 0 | 0 |
| Solyc04g078310.3                 | 2.48 | 9.5E-06 | cyclin A3_1                                      | Cell cycle control                               | 2 | 1 | 3 |
| Solyc02g092980.3                 | 0.59 | 4.8E-03 | cyclin D3.1                                      | Cell cycle control                               | 1 | 1 | 2 |
| Solyc12g088650.2                 | 1.34 | 3.3E-05 | cyclinD3_2                                       | Cell cycle control                               | 2 | 1 | 3 |
| Solyc01g089850.4                 | 0.74 | 4.1E-03 | cyclinU4_1                                       | Cell cycle control                               | 0 | 0 | 0 |
| Solyc12g098310.2                 | 1.08 | 8.7E-03 | Cyclin-dependent kinase inhibitor, KRP           | Cell cycle control                               | 2 | 0 | 2 |
| Solyc11g008740.2                 | 0.86 | 8.5E-03 | Sister chromatid cohesion 1 protein 4            | Sister chromatid separation                      | 0 | 1 | 1 |
| Solyc02g093930.4                 | 1.03 | 6.9E-04 | sister chromatid cohesion 1 protein 2            | Sister chromatid separation                      | 1 | 1 | 2 |
| Solyc01g103960.3                 | 1.12 | 6.5E-05 | RNA helicase DEAH-box15 (RecQ4A)                 | Meiotic recombination                            | 0 | 3 | 3 |
| Solyc06g083530.3                 | 0.62 | 9.4E-03 | Vesicle-associated membrane protein              | Cytokinesis.cell-plate formation                 | 1 | 0 | 1 |
| Solyc07g066520.3                 | 0.74 | 7.9E-03 | interactor of constitutive active ROPs protein   | Cytokinesis.endoplasmic reticulum reorganisation | 0 | 2 | 2 |
| <b>Cytoskeleton organisation</b> |      |         |                                                  |                                                  |   |   |   |
| Solyc02g087880.3                 | 0.71 | 1.1E-03 | Tubulin alpha chain                              | Alpha-beta-Tubulin heterodimer                   | 1 | 1 | 2 |
| Solyc04g081490.3                 | 0.70 | 4.2E-03 | beta-tubulin                                     | Alpha-beta-Tubulin heterodimer                   | 2 | 0 | 2 |
| Solyc09g010810.3                 | 1.08 | 7.3E-04 | Kinesin-like protein                             | Kinesin microtubule-based motor protein          | 3 | 0 | 3 |
| Solyc01g010270.3                 | 0.92 | 1.8E-04 | Protein SPIRAL1                                  | Microtubule dynamics                             | 0 | 1 | 1 |
| Solyc10g081730.2                 | 0.76 | 1.5E-03 | Protein WVD2-like 1                              | Microtubule dynamics                             | 2 | 0 | 2 |
| Solyc02g067950.4                 | 1.67 | 3.7E-03 | TPX2 (Targeting protein for Xklp2) protein       | Microtubule dynamics                             | 0 | 1 | 1 |
| Solyc11g062390.3                 | 1.10 | 1.5E-04 | Stomatal closure-related actin-binding protein 1 | Actin organisation                               | 0 | 2 | 2 |
| Solyc07g063590.4                 | 2.68 | 4.2E-18 | Myosin-2                                         | Myosin microfilament-based motor protein         | 0 | 0 | 0 |
| Solyc11g042470.1                 | 6.80 | 4.8E-03 | Tubulin-folding cofactor E                       | Actin and tubulin folding                        | 1 | 0 | 1 |
| <b>Multi-process regulation</b>  |      |         |                                                  |                                                  |   |   |   |
| Solyc03g114070.3                 | 0.92 | 3.8E-03 | Rac-like GTP binding protein                     | ROP-GTPase regulatory system                     | 4 | 0 | 4 |
| Solyc12g007210.2                 | 0.92 | 4.6E-03 | Rac-like GTP binding protein                     | ROP-GTPase regulatory system                     | 0 | 0 | 0 |
| Solyc06g084450.4                 | 0.93 | 3.5E-03 | Rho GTPase-activating protein 2                  | ROP-GTPase regulatory system                     | 2 | 0 | 2 |

|                  |      |         |                                 |                              |   |   |   |
|------------------|------|---------|---------------------------------|------------------------------|---|---|---|
| Solyc09g074340.3 | 1.38 | 8.0E-07 | Rho GTPase-activating protein 2 | ROP-GTPase regulatory system | 0 | 0 | 0 |
|------------------|------|---------|---------------------------------|------------------------------|---|---|---|

---

1007

1008

1009

1010 **Figure legends**

1011

1012 **Figure 1. Gel-less mutant phenotype and mapping. A)** Equatorial section and partial  
1013 dissection of the pericarp of a red-ripe (RR) fruit from a WT plant and **B)** a *gel-less* plant.  
1014 **C)** Seed from a WT (left) and a *gel-less* plant (right). **D)** Mapping of the *gel-less* mutation  
1015 on chromosome 7. The position of the markers are indicated in bp. **E)** Visualisation of the  
1016 insertion site in the *gel-less* bulk using Integrative Genomics Viewer alignment  
1017 visualisation tool. The positions in Micro-Tom SLmic1.0 are indicated in bp. **F)** Schematic  
1018 representation of the WT and mutant alleles. The Ty1-copia type retrotransposon is  
1019 flanked by target direct repeats (5 bp, yellow) and Long Terminal Repeats (LTR, 217 bp,  
1020 orange). It consists of a Primer Binding Site (PBS, black), three Open reading Frames  
1021 (783, 372 and 3116 bp, red) and a polypurine track (green). The two qRT-PCR primer  
1022 pairs designed for the 5'-UTR (ZFP2-5'UTR) and the C-terminal part of the ORF (ZFP2-  
1023 CT) are indicated as a red line on the WT allele. ORF1 and ORF3 show sequence  
1024 homology with the retrotransposon Group-specific Antigen (GAG) and the polyprotein  
1025 (pol), respectively, including motifs for integrase (INT), reverse transcriptase (RT), and  
1026 RNase H. The positions in Micro-Tom SLmic1.0 are indicated in bp. **G)** Expression profile  
1027 of *SIZFP2* in the columella of 14 DPA fruits using ZFP2-5'UTR and ZFP2-CT primer pairs  
1028 in the WT and in plants from the WT-like and mutants bulks.  $\Delta\Delta$ ct normalized expressions  
1029 are given in arbitrary units relative to the tomato actin 2/7 and Eif4a internal controls. The  
1030 WT sample was used as reference. Standard deviations are given for 2 to 4 biological  
1031 replicates. Significant differences with the WT are indicated by \* (T-test,  $P$ -value<0.05) .

1032 **Figure 2. Fruit tissue development in WT and *zfp2-c* lines. A)** Equatorial section of  
1033 ovary at anthesis (0 DPA) and developing fruit at 5 and 25 DPA in the WT and *zfp2-c2.5*  
1034 (*c2.5*), *zfp2-c11.5* (*c11.5*), *zfp2-c2.11* (*c2.11*) and *zfp2-c4.1* (*c.4.1*) CRISPR lines. **B)**  
1035 Relative proportion of the fruit tissues in the whole fruit section. Values represent the  
1036 mean proportion (n=7 to 9 at 0 DPA, and n=4 to 8 at 5 and 25 DPA). Significant  
1037 differences between the WT and *zfp2-c* lines (Wilcoxon test,  $P$ -value <0.05 with FDR  
1038 adjustment) are indicated with a black star.

1039 **Figure 3. Cellular parameters and related gene expression in WT and *zfp2-c* lines**  
1040 **during locular tissue differentiation. A)** Equatorial section of locular tissue in WT (left),  
1041 *zfp2-c2.5*, (middle) and *zfp2-c2.11* (right) fruits at 6 DPA. The blue and purple signals

1042 correspond respectively to Calcofluor White and Propidium Iodure stainings. Locular  
1043 tissue, LT; Pericarp, Pe; Seed, Sd. The scale bar corresponds to 100  $\mu\text{m}$ . **B)** Mean cell  
1044 area within LT in *zfp2-c2.5* (green) and *zfp2-c2.11* (grey) fruits compared to WT fruits  
1045 (black) from anthesis to 25 DPA. The delineation of the zone of interest is presented in  
1046 Supplemental Fig S6. **C) to F)** Cell ploidy measurement on whole fruits from 0-4 DPA and  
1047 on central tissues from 6-25 DPA fruits dissected as described in Supplemental Fig. S7.  
1048 Time point values represent means  $\pm$  Pearson standard deviation (B,  $n=4-23$  and C to F,  
1049  $n=5-8$ ). **G) to I)** Relative gene expression of **G)** *SICDKB1.1*, **H)** *SIKNOLLE* and **F)**  
1050 *SICCS52A*. RT-qPCR analysis were performed on whole fruits RNA from 0-6 DPA and  
1051 on central tissues from 8-25 DPA dissected as described in Supplemental Fig S7.  $\Delta\Delta\text{ct}$   
1052 normalized expression is given in arbitrary units, relative to *SIEiF4a* housekeeping gene.  
1053 Time point values represent means  $\pm$  Pearson standard deviation of the three biological  
1054 replicates. a,b,c represent significant differences (Wilcoxon test, P-value  $<0.05$  with FDR  
1055 adjustment) between *zfp2-c2.11* and WT, *zfp2-c2.5* and WT, *zfp2-c2.11* and *zfp2-c2.5*  
1056 respectively.

1057 **Figure 4. Modelisation of locular tissue growth in the WT and in *zfp-c* mutant lines.**  
1058 **A)** Schematic representation of the model (modification from the figure in Baldazzi et al.,  
1059 2019). The model considers the organ cells as divided into groups formed by either  
1060 proliferating cells (contoured circles) or non-proliferating cells (empty circles). Each group  
1061 has a given ploidy. The model follows the processes of division and expansion of each  
1062 group of cells, starting from a group of proliferating cells with a given number of cells  $n_0$   
1063 in 2C ploidy. At each division event, determined by the division time ( $\tau$ , hours), a fraction  
1064 of proliferating cells ( $\theta$ ) divide. After the division event, new cells are added to the group  
1065 of proliferating cells, while the rest of the cells starts endoreduplication. Thus, a new group  
1066 of 4C cells is formed. After a given time ( $\tau_{EO}$ , hours) a fraction ( $\sigma$ ) of the cells belonging to  
1067 this group starts endoreduplication, creating a new group of a higher ploidy level. At the  
1068 same time, another fraction of 2C cells starts the endoreduplication step. Arrows indicates  
1069 the changes in the ploidy of the cells. **B)** Model predictions of the dynamics of the number  
1070 of cells in locular tissue in the three hypotheses: only division parameters are different,  
1071 only endoreduplication parameters are different, division and endoreduplication  
1072 parameters are different. Empty circles and bars are the mean and the standard deviation  
1073 of experimental values for cell number in the locular tissue. Full circles and surfaces show  
1074 the average and the interval between the 25th and 75th percentile of the 25 solutions that  
1075 were selected as described in the material and methods section. DPA, Days post

1076 anthesis. **C)** Boxplots of the model parameters in the “division and endoreduplication are  
1077 different” hypothesis for each genotype.

1078 **Figure 5. RNA-seq analyses of emerging domes at 4 DPA in *zfp2-c11* line compared**  
1079 **to WT. A)** Equatorial section of 4 DPA fruits in WT (left) and *zfp2-c11.5* (right). Fruits were  
1080 fixed, embedded in paraffin and 6 µm sections were stained with 0.25% Astra blue and  
1081 0.2% Safranin. **B)** Enriched MAPMAN functional categories in *zfp2-c11.5* compared to  
1082 WT. **C)** and **D)** Enriched GO functional in *zfp2-c11.5* compared to WT. Over  
1083 representation of functional categories in the annotations of gene lists was assessed with  
1084 Fisher exact tests followed by adjustment of the p-values for multiple testing with the  
1085 Benjamini-Hochberg method. Among the 16210 genes analyzed, genes with an adjusted  
1086 p-value<0.01 were considered as DEGs. **E)** The two core motifs significantly enriched in  
1087 *zfp2-c11* up-regulated genes. The p-value was obtained by Fisher’s exact test based on  
1088 the presence of at least one sequence in the promoters.

1089

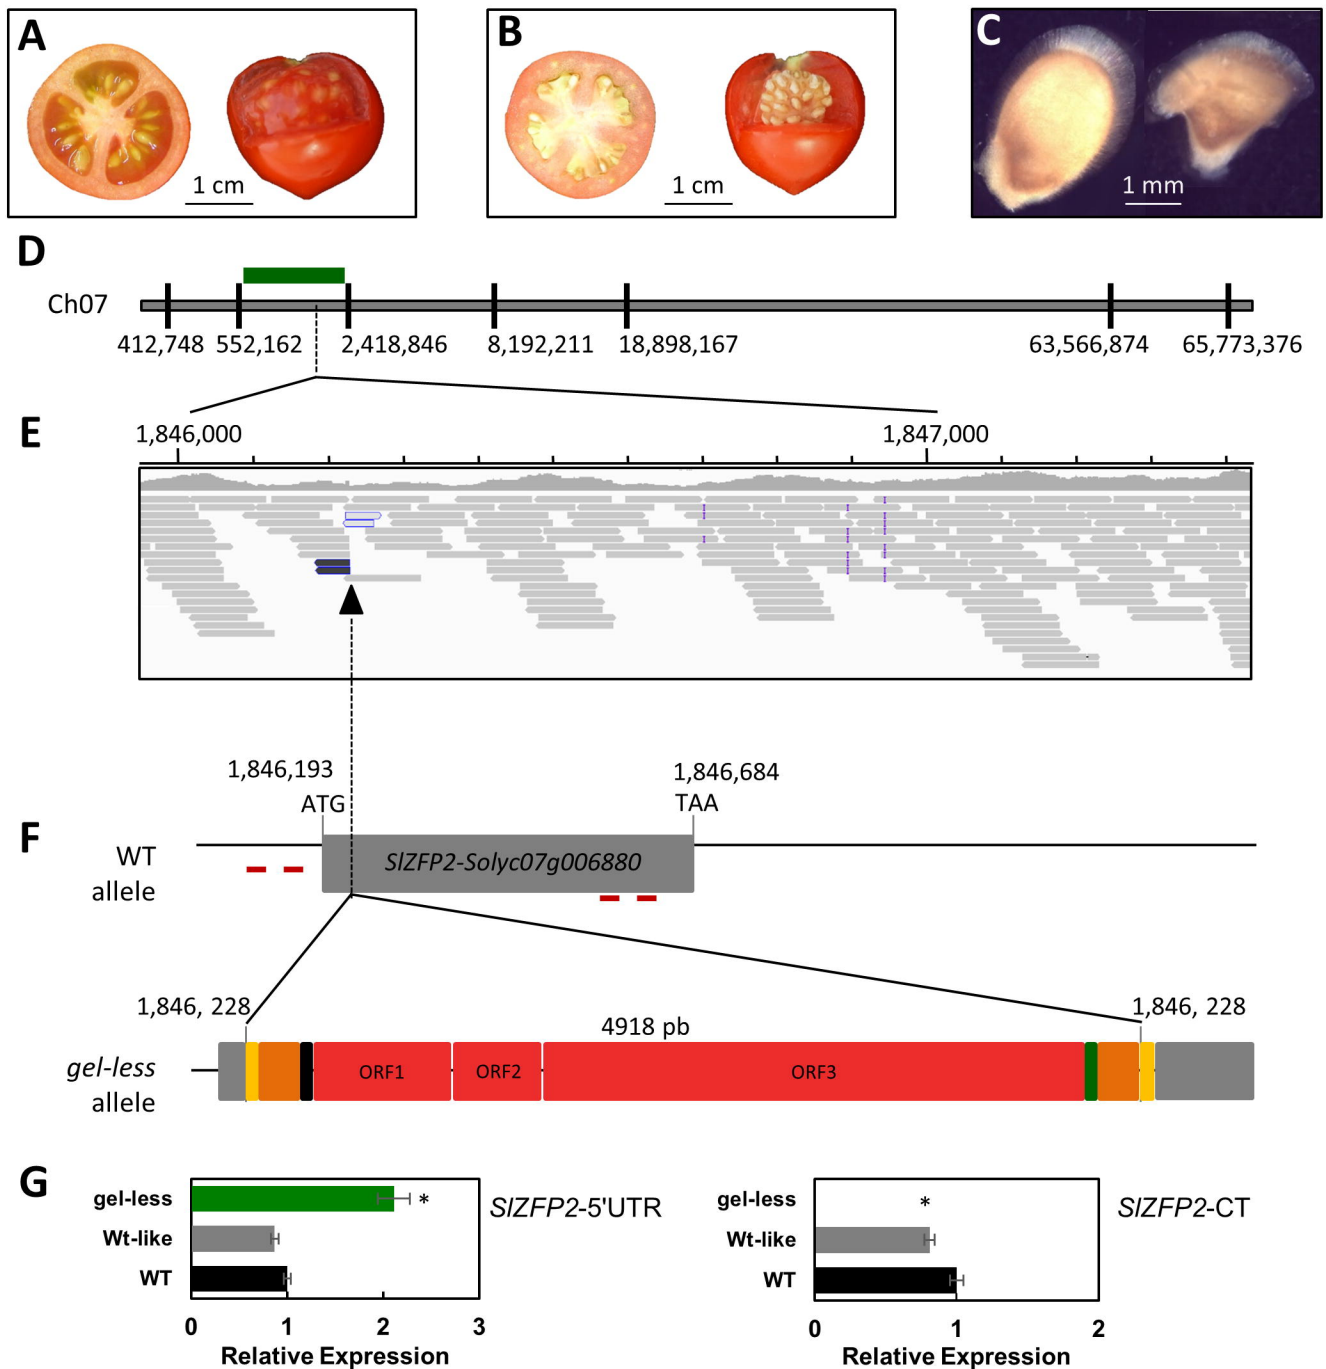

**Figure 1. *Gel-less* mutant phenotype and mapping.** **A)** Equatorial section and partial dissection of the pericarp of a red-ripe (RR) fruit from a WT plant and **B)** a *gel-less* plant. **C)** Seed from a WT (left) and a *gel-less* plant (right). **D)** Mapping of the *gel-less* mutation on chromosome 7. The position of the markers are indicated in bp. **E)** Visualisation of the insertion site in the *gel-less* bulk using Integrative Genomics Viewer alignment visualisation tool. The positions in Micro-Tom SLmic1.0 are indicated in bp. **F)** Schematic representation of the WT and mutant alleles. The Ty1-copia type retrotransposon is flanked by target direct repeats (5 bp, yellow) and Long Terminal Repeats (LTR, 217 bp, orange). It consists of a Primer Binding Site (PBS, black), three Open reading Frames (783, 372 and 3116 bp, red) and a polypurine track (green). The two qRT-PCR primer pairs designed for the 5'-UTR (ZFP2-5'UTR) and the C-terminal part of the ORF (ZFP2-CT) are indicated as a red line on the WT allele. ORF1 and ORF3 show sequence homology with the retrotransposon Group-specific Antigen (GAG) and the polyprotein (pol), respectively, including motifs for integrase (INT), reverse transcriptase (RT), and RNase H. The positions in Micro-Tom SLmic1.0 are indicated in bp. **G)** Expression profile of *SIZFP2* in the columella of 14 DPA fruits using ZFP2-5'UTR and ZFP2-CT primer pairs in the WT and in plants from the WT-like and mutants bulks.  $\Delta\Delta$ ct normalized expressions are given in arbitrary units relative to the tomato actin 2/7 and Eif4a internal controls. The WT sample was used as reference. Standard deviations are given for 2 to 4 biological replicates. Significant differences with the WT are indicated by \* (T-test,  $P$ -value < 0.05).



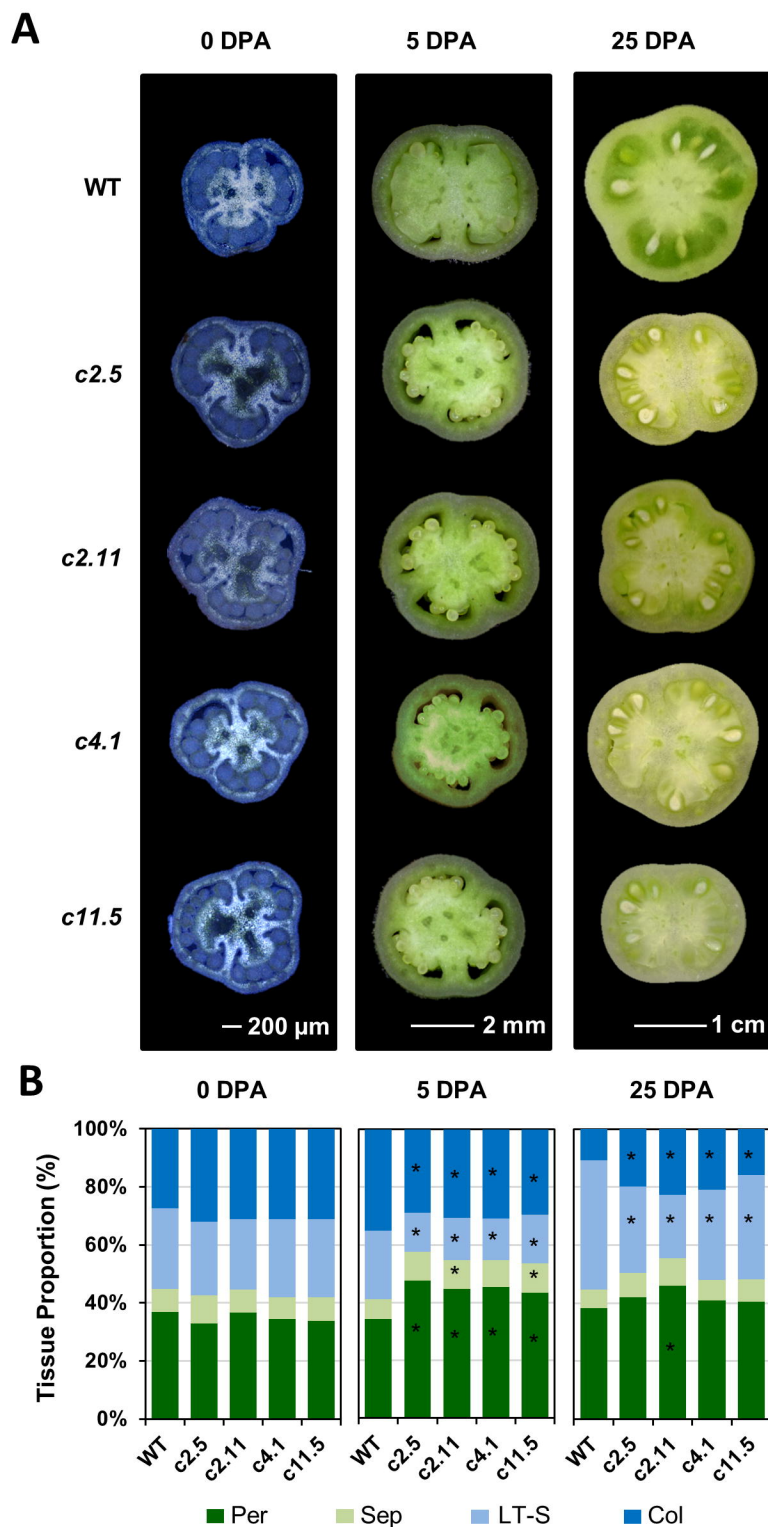

**Figure 2. Fruit tissue development in WT and *zfp2-c* lines.**

**A)** Equatorial section of ovary at anthesis (0 DPA) and developing fruit at 5 and 25 DPA in the WT and *zfp2-c2.5* (*c2.5*), *zfp2-c11.5* (*c11.5*), *zfp2-c2.11* (*c2.11*) and *zfp2-c4.1* (*c4.1*) CRISPR lines. **B)** Relative proportion of the fruit tissues in the whole fruit section. Values represent the mean proportion (n=7 to 9 at 0 DPA, and n=4 to 8 at 5 and 25 DPA). Significant differences between the WT and *zfp2-c* lines (Wilcoxon test, P-value <0.05 with FDR adjustment) are indicated with a black star.

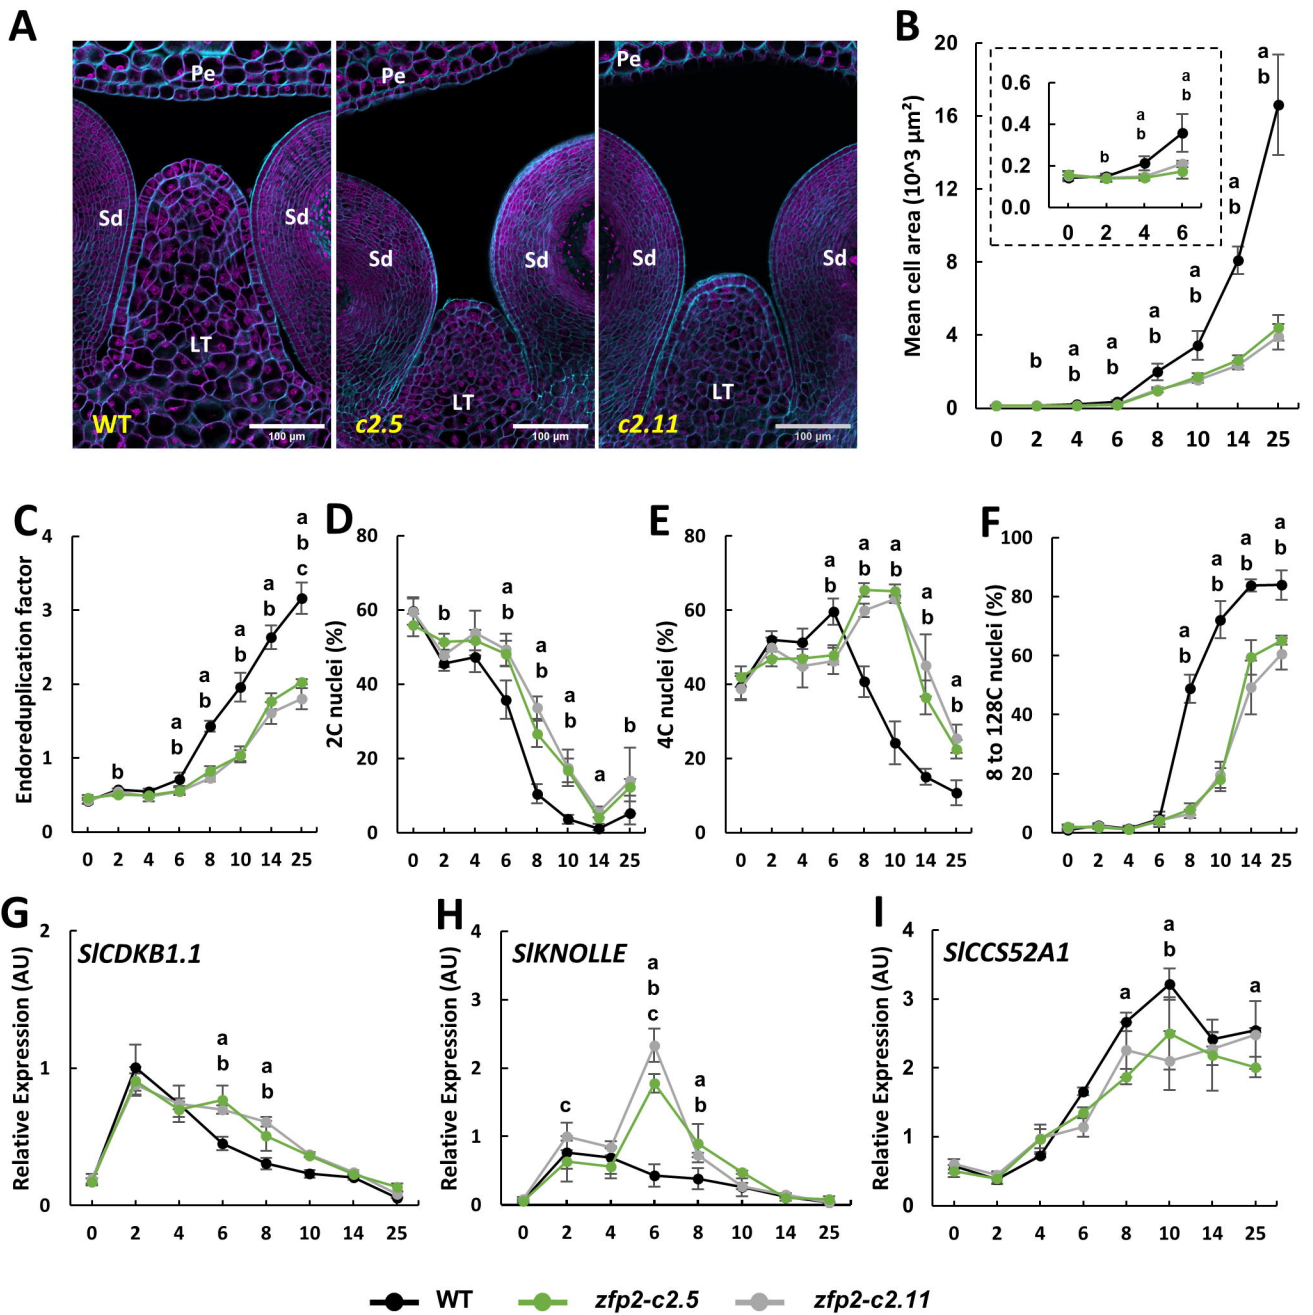

**Figure 3. Cellular parameters and related gene expression in WT and *zfp2-c* lines during locular tissue differentiation.** **A)** Equatorial section of locular tissue in WT (left), *zfp2-c2.5*, (middle) and *zfp2-c2.11* (right) fruits at 6 DPA. The blue and purple signals correspond respectively to Calcofluor White and Propidium Iodure stainings. Locular tissue, LT; Pericarp, Pe; Seed, Sd. The scale bar corresponds to 100  $\mu\text{m}$ . **B)** Mean cell area within LT in *zfp2-c2.5* (green) and *zfp2-c2.11* (grey) fruits compared to WT fruits (black) from anthesis to 25 DPA. The delineation of the zone of interest is presented in Supplemental Fig S6. **C) to F)** Cell ploidy measurement on whole fruits from 0-4 DPA and on central tissues from 6-25 DPA fruits dissected as described in Supplemental Fig. S7. Time point values represent means  $\pm$  Pearson standard deviation (B,  $n=4-23$  and C to F,  $n=5-8$ ). **G) to I)** Relative gene expression of **G)** *SICDKB1.1*, **H)** *SIKNOLLE* and **F)** *SICCS52A1*. RT-qPCR analysis were performed on whole fruits RNA from 0-6 DPA and on central tissues from 8-25 DPA dissected as described in Supplemental Fig S7.  $\Delta\Delta\text{ct}$  normalized expression is given in arbitrary units, relative to *SIEF4a* housekeeping gene. Time point values represent means  $\pm$  Pearson standard deviation of the three biological replicates. a,b,c represent significant differences (Wilcoxon test, P-value  $<0.05$  with FDR adjustment) between *zfp2-c2.11* and WT, *zfp2-c2.5* and WT, *zfp2-c2.11* and *zfp2-c2.5* respectively.

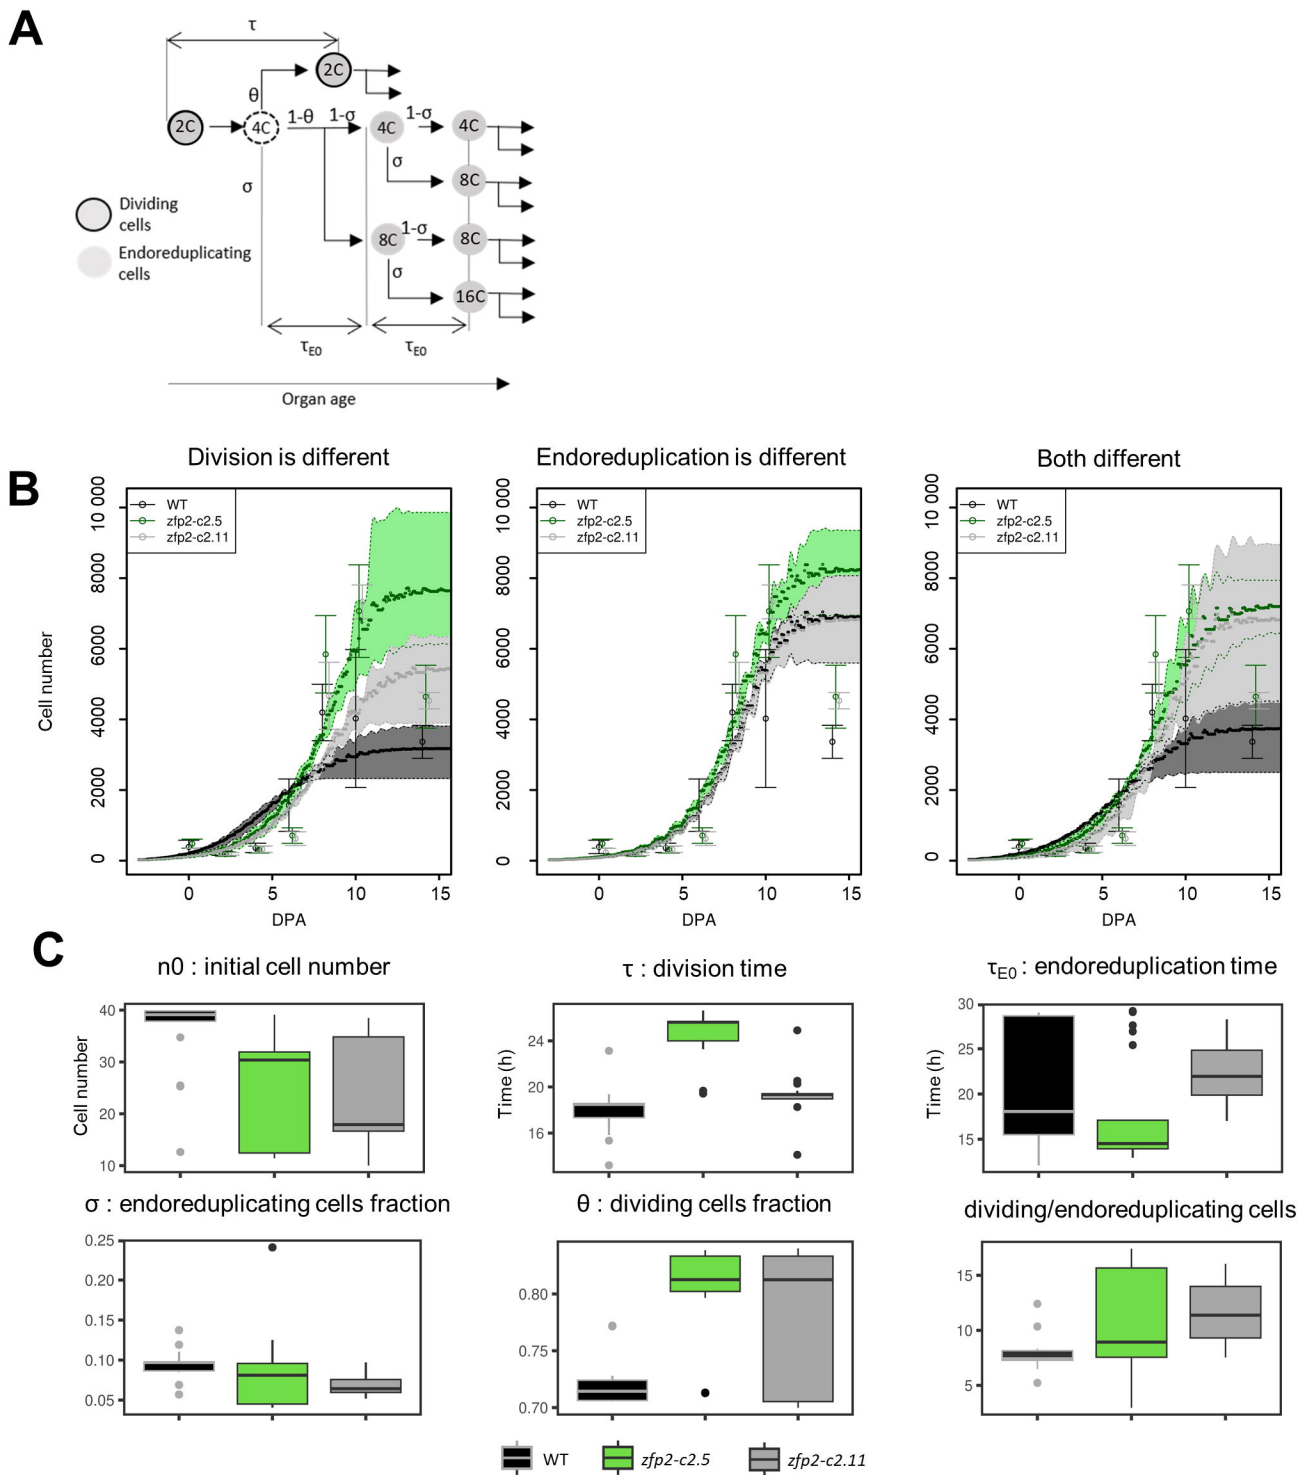

**Figure 4. Modélisation of ocular tissue growth in the WT and in *zfp-c* mutant lines. A)** Schematic representation of the model (modification from the figure in Baldazzi et al., 2019). The model considers the organ cells as divided into groups formed by either proliferating cells (contoured circles) or non-proliferating cells (empty circles). Each group has a given ploidy. The model follows the processes of division and expansion of each group of cells, starting from a group of proliferating cells with a given number of cells  $n_0$  in 2C ploidy. At each division event, determined by the division time ( $\tau$ , hours), a fraction of proliferating cells ( $\theta$ ) divide. After the division event, new cells are added to the group of proliferating cells, while the rest of the cells starts endoreduplication. Thus, a new group of 4C cells is formed. After a given time ( $\tau_{E0}$ , hours) a fraction ( $\sigma$ ) of the cells belonging to this group starts endoreduplication, creating a new group of a higher ploidy level. At the same time, another fraction of 2C cells starts the endoreduplication step. Arrows indicates the changes in the ploidy of the cells. **B)** Model predictions of the dynamics of the number of cells in ocular tissue in the three hypotheses: only division parameters are different, only endoreduplication parameters are different, division and endoreduplication parameters are different. Empty circles and bars are the mean and the standard deviation of experimental values for cell number in the ocular tissue. Full circles and surfaces show the average and the interval between the 25th and 75th percentile of the 25 solutions that were selected as described in the material and methods section. DPA, Days post anthesis. **C)** Boxplots of the model parameters in the “division and endoreduplication are different” hypothesis for each genotype.



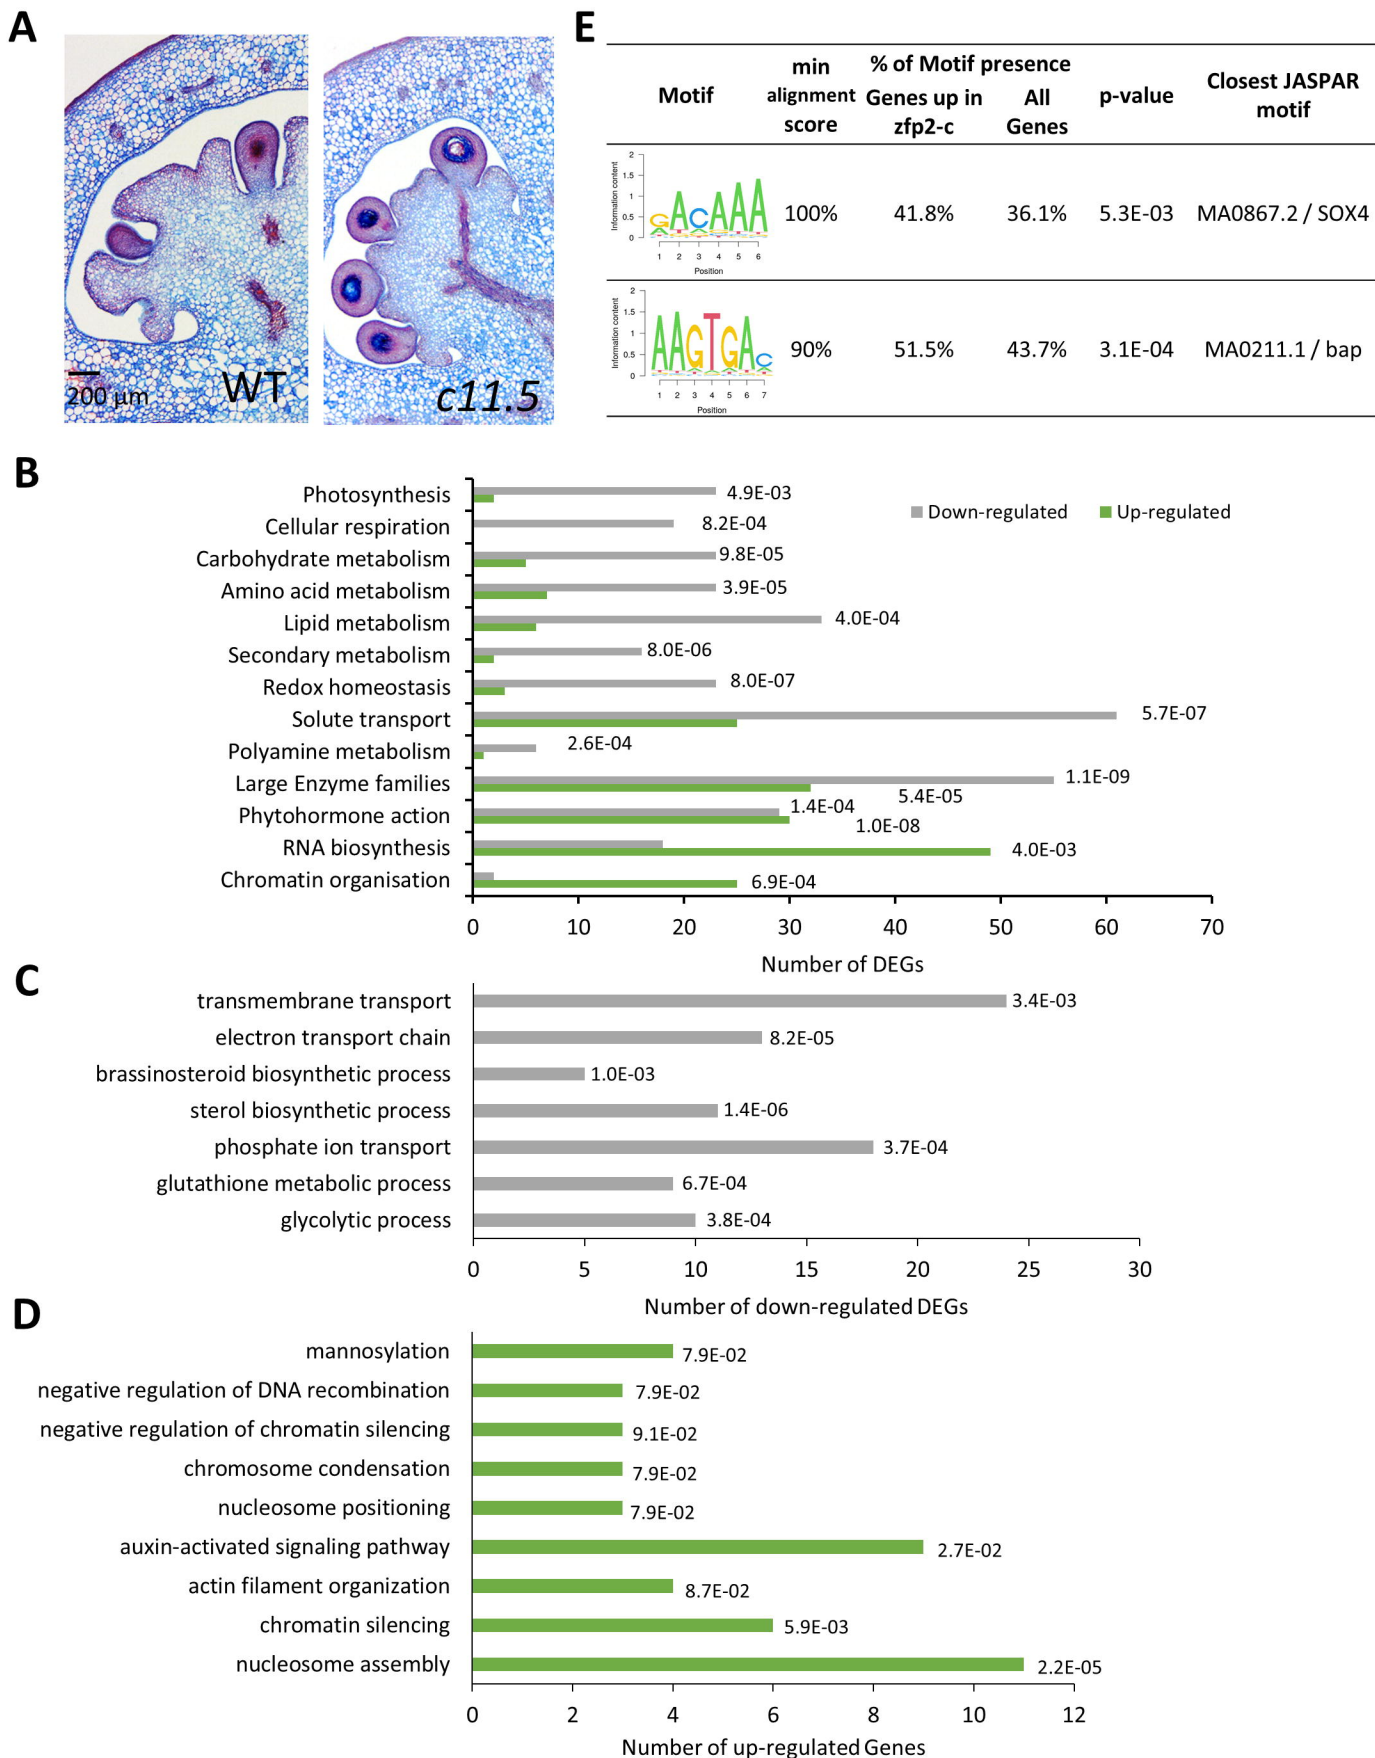

**Figure 5. RNA-seq analyses of emerging domes at 4 DPA in *zfp2-c11* line compared to WT. A)** Equatorial section of 4 DPA fruits in WT (left) and *zfp2-c11.5* (right). Fruits were fixed, embedded in paraffin and 6  $\mu$ m sections were stained with 0.25% Astra blue and 0.2% Safranin. **B)** Enriched MAPMAN functional categories in *zfp2-c11.5* compared to WT. **C)** and **D)** Enriched GO functional in *zfp2-c11.5* compared to WT. Over representation of functional categories in the annotations of gene lists was assessed with Fisher exact tests followed by adjustment of the p-values for multiple testing with the Benjamini-Hochberg method. Among the 16210 genes analyzed, genes with an adjusted p-value < 0.01 were considered as DEGs. **E)** The two core motifs significantly enriched in *zfp2-c11* up-regulated genes. The p-value was obtained by Fisher's exact test based on the presence of at least one sequence in the promoters.
